# Supplementary material for: Resolving old problems with layered polytungstates related to hexagonal tungsten bronze: phase formation, structures, crystal chemistry and some properties
Source: Royal Society of Chemistry journal article supplement (doi:10.1039/d2dt03895a), 2023-01-01
Supplement: d2dt03895a1.pdf [file d2dt03895a1.pdf]

**Electronic Supplementary Material (ESI) for Dalton Transactions.  
This journal is © The Royal Society of Chemistry 2023**

**Supporting information: Resolving old problems with layered polytungstates related to the hexagonal tungsten bronze: phase formation, structures, crystal chemistry and some properties**

**Sergey F. Solodovnikov<sup>a</sup>, Arkadiy B. Meshalkin<sup>b</sup>, Aleksandr S. Sukhikh<sup>a</sup>, Zoya A. Solodovnikova<sup>a</sup>, Evgeniya S. Zolotova<sup>a</sup>, Vasiliy N. Yudin<sup>a1\*</sup>, Yuliya M. Kadyrova<sup>c</sup>, Elena G. Khaikina<sup>c</sup>, Yuliya G. Mateyshina<sup>d</sup>, Nikolai F. Uvarov<sup>d</sup>, Aleksey M. Pugachev<sup>e</sup> and Evgeniy V. Kovtunets<sup>c</sup>**

*<sup>a</sup>Nikolaev Institute of Inorganic Chemistry, Siberian Branch, Russian Academy of Sciences, Acad. Lavrentyev Ave. 3, Novosibirsk 630090, Russia*

*<sup>b</sup>Kutateladze Institute of Thermophysics, Siberian Branch, Russian Academy of Sciences, Acad. Lavrentyev Ave. 1, Novosibirsk 630090, Russia*

*<sup>c</sup>Baikal Institute of Nature Management, Siberian Branch, Russian Academy of Sciences, Sakh'yanova St. 6, Ulan-Ude, 670047, Buryat Republic, Russia*

*<sup>d</sup>Institute of Solid State Chemistry and Mechanochemistry, Siberian Branch, Russian Academy of Sciences, Kutateladze St. 18, Novosibirsk 630128, Russia*

*<sup>e</sup>Institute of Automation and Electrometry, Siberian Branch, Russian Academy of Sciences, Acad. Koptug Ave. 1, Novosibirsk 630090, Russia*

E-mail: [yudin@niic.nsc.ru](mailto:yudin@niic.nsc.ru)

---

\*1 Corresponding author. Fax: +7(383) 3309489. Phone: +7(383) 3308465.  
E-mail: [yudin@niic.nsc.ru](mailto:yudin@niic.nsc.ru) (V.N. Yudin).

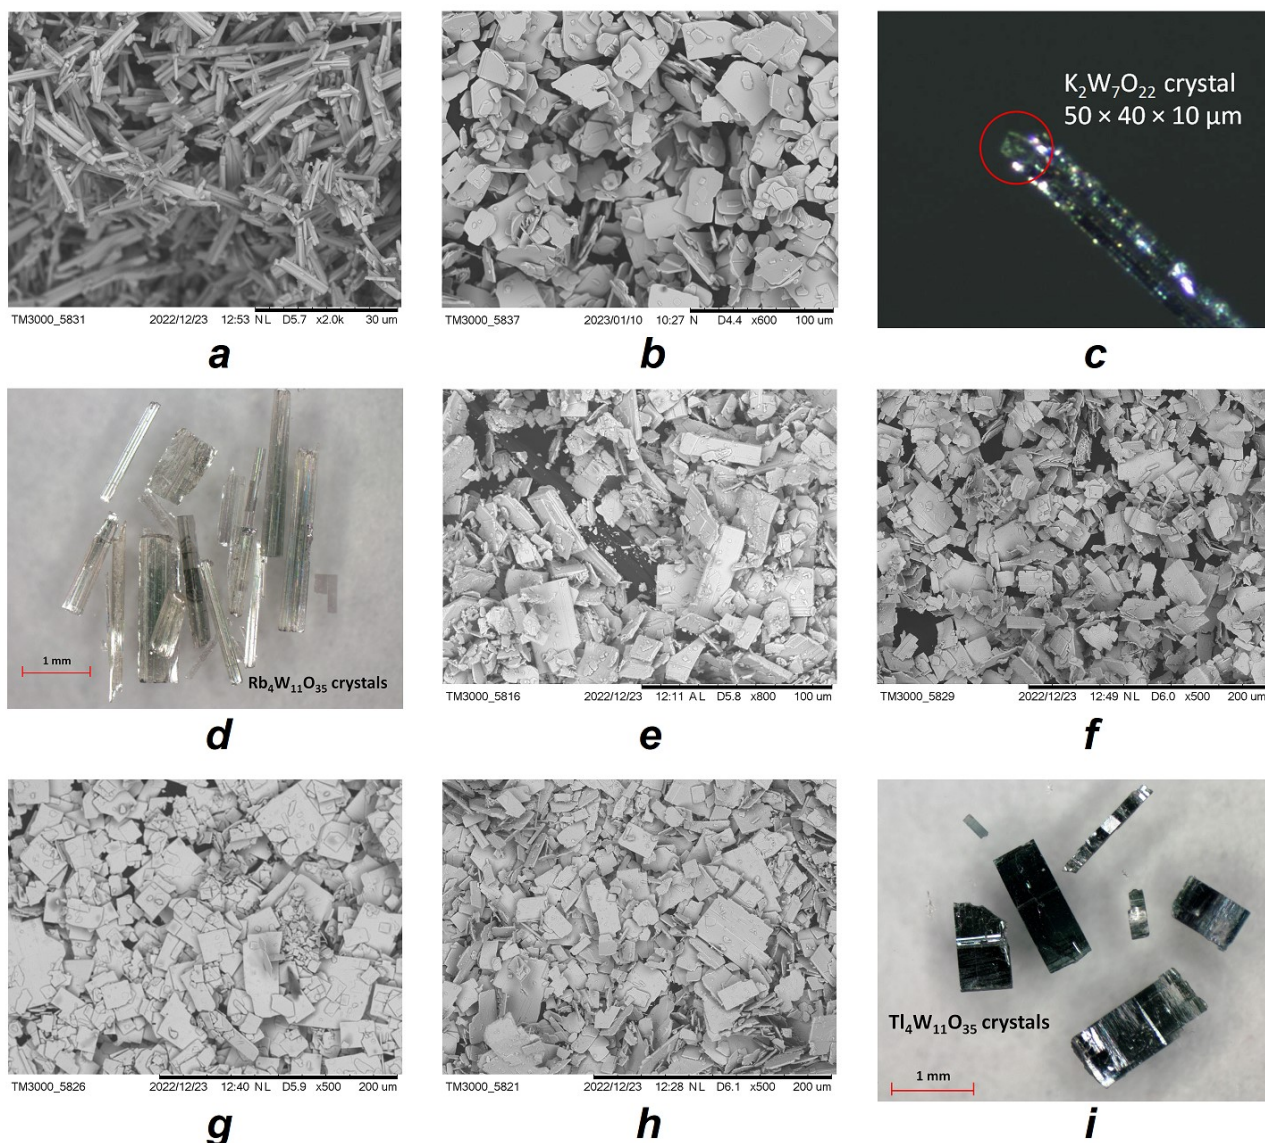

**Figure S1.** SEM images and photos of prepared powders and crystals of HTB-related polytungstates: (a)  $\text{K}_4\text{W}_{11}\text{O}_{35}$  (powder); (b)  $\text{K}_2\text{W}_7\text{O}_{22}$  (powder); (c)  $\text{K}_2\text{W}_7\text{O}_{22}$  (crystal at a single-crystal diffractometer); (d)  $\text{Rb}_4\text{W}_{11}\text{O}_{35}$  (crystals); (e)  $\text{Rb}_4\text{W}_{11}\text{O}_{35}$  (powder); (f)  $\text{Rb}_2\text{W}_7\text{O}_{22}$  (powder); (g)  $\text{Cs}_4\text{W}_{11}\text{O}_{35}$  (powder); (h)  $\text{Cs}_2\text{W}_7\text{O}_{22}$  (powder); (i)  $\text{Tl}_4\text{W}_{11}\text{O}_{35}$  (crystals).

### Details of the oscillation phase analysis (OPA) method

The corresponding studies were performed on an experimental setup (Fig. S2) combined the methods of OPA [1–3] and conventional thermal analysis. The method is based on that a thin platinum plate immersed in a studied liquid performs forced continuous oscillations on an elastic suspension under a harmonic force influence with a constant amplitude. When the medium state changes, the oscillation parameters of the probe plate change too. When crystals form on cooling of the sample (including crystals on the plate), the hydrodynamic resistance of the plate increases sharply, and the amplitude of the

oscillations falls dramatically (Fig. S3). Thermal effects at heating can be studied using TA curves (Fig. S4). The OPA method allows one to evaluate both the melt viscosity at various temperatures and to determine the liquidus temperature along with the onset of spontaneous crystallization.

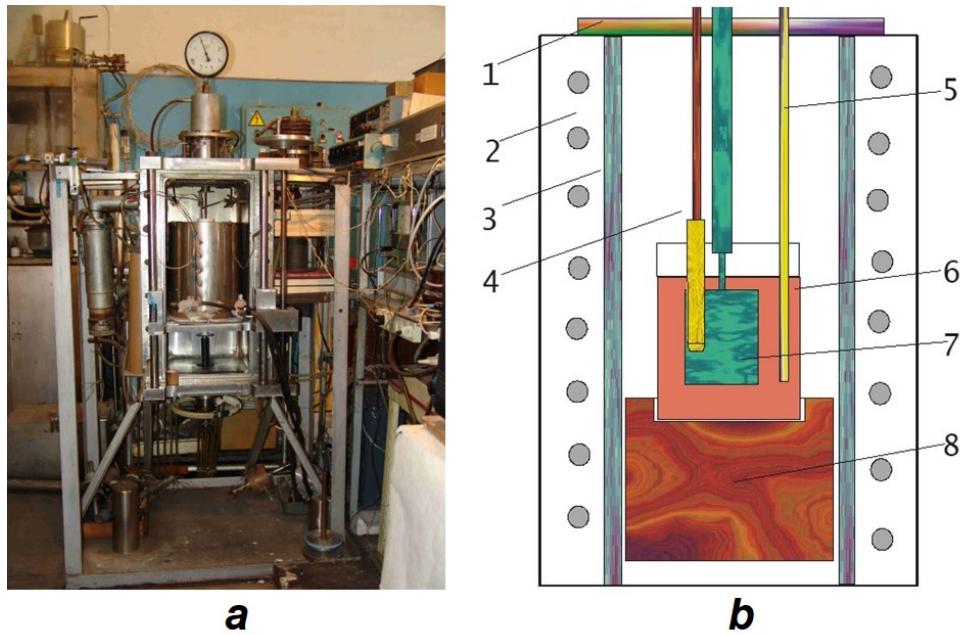

**Figure S2.** A general view of the OPA setup (a) and the scheme of the measuring cell (b): (1) ceramic lid; (2) high temperature resistance furnace; (3) ceramic (mullite) tube, (4) Pt-Pt/Rh thermocouple in Pt jacket; (5) Pt tube for bubbling air or other gas, (6) Pt crucible with melt; (7) viscometer probe (Pt plate); (8) ceramic support.

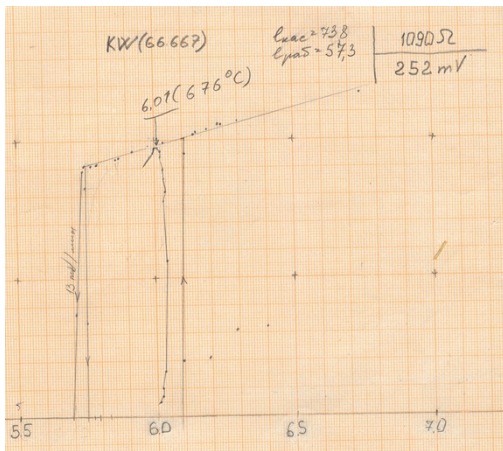

**Figure S3.** Oscillogram of  $K_2W_2O_7$  melt at cooling and heating at  $5\text{ °C/min}$

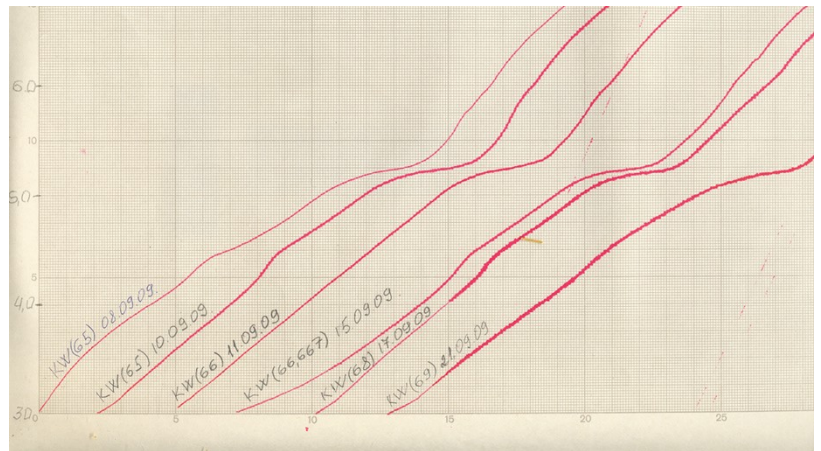

**Figure S4.** TA heating curves of some samples of the  $K_2WO_4$ - $WO_3$  system at heating rates of  $5\text{ °C/min}$

Phase equilibria, crystallization and melting processes in the  $K_2WO_4$ - $WO_3$  system were studied with the OPA method on 25 molten samples in the range of 0–72 mol%  $WO_3$  up to  $1000\text{ °C}$ . A platinum

crucible of diameter 45 mm and height 50 mm with a pre-synthesized sample of 100-150 g mass was placed in a ceramic measuring cell heated by a furnace. The temperature of the sample was measured by a Pt-Pt/Rh thermocouple in a platinum jacket immersed in the sample melt to depth of about 20 mm. The melt height was about 30 mm. The melt homogeneity was maintained by bubbling of air through a platinum pipe. The measurement errors for the liquidus temperatures and melting points by the OPA method were no more than  $\pm 2-3$  °C [2]. To obtain additional information on phase transformations in the system, heating DTA curves were taken during the experiments at a heating rate of 5 °C/min (Fig. S4). If necessary, the probe platinum plate was removed from the melt together with crystals formed during the experiments near the liquidus temperatures for subsequent XRD identification.

## References

1. A.B. Kaplun and A.B. Meshalkin, *J. Crystal Growth*, 2005, **275**, e1975–e1981.
2. A.B. Kaplun and A.B. Meshalkin, *J. Therm. Anal. Calorim.*, 2008, **92**, 687–690.
3. A.B. Kaplun and A.B. Meshalkin, *High Temperature*, 2010, **48**, 527–533.

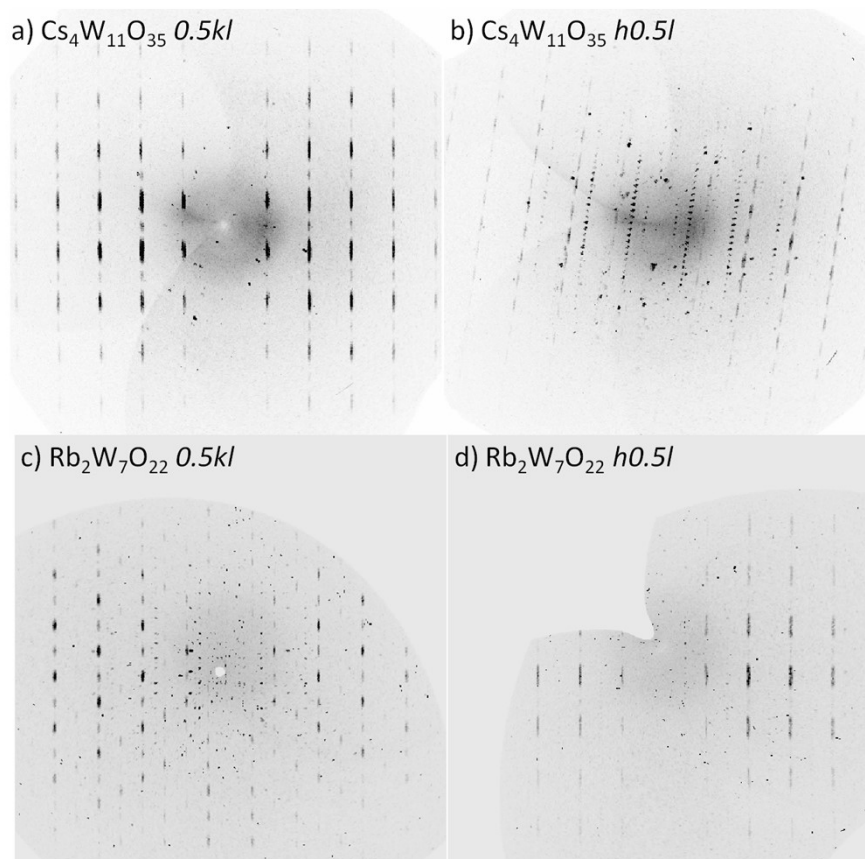

**Figure S5:** Precession images for  $0.5kl$  plane of  $\text{Cs}_4\text{W}_{11}\text{O}_{35}$  (a),  $h0.5l$  plane of  $\text{Cs}_4\text{W}_{11}\text{O}_{35}$  (b),  $0.5kl$  plane of  $\text{Rb}_2\text{W}_7\text{O}_{22}$  (c) and  $h0.5l$  plane of  $\text{Rb}_2\text{W}_7\text{O}_{22}$  (d).

## Powder SHG Test

The SHG responses of the HTB-related polytungstates at room temperature were measured in back-scattering geometry by means of the modified Kurtz-Perry powder method. SHG signal was excited by a pulsed Nd: YAG laser (STA-01-7, Standa) with a wavelength of 1064 nm. The SHG signal at  $\lambda = 532$  nm was selected by a collimator and registered by the spectrometer equipped with a CCD camera (Spec-10:256 E/LN Princeton Inst.), recorded in into a file and fit it by Lorentz contour. The integral intensity of this signal was normalized to the corresponding value of the crystalline quartz. Recording a nonlinear response with a high spectral resolution makes it possible to distinguish a narrow-band frequency SHG signal against the background of broadband noise, in particular, two-photon luminescence. This is especially relevant for recording relatively small signals.

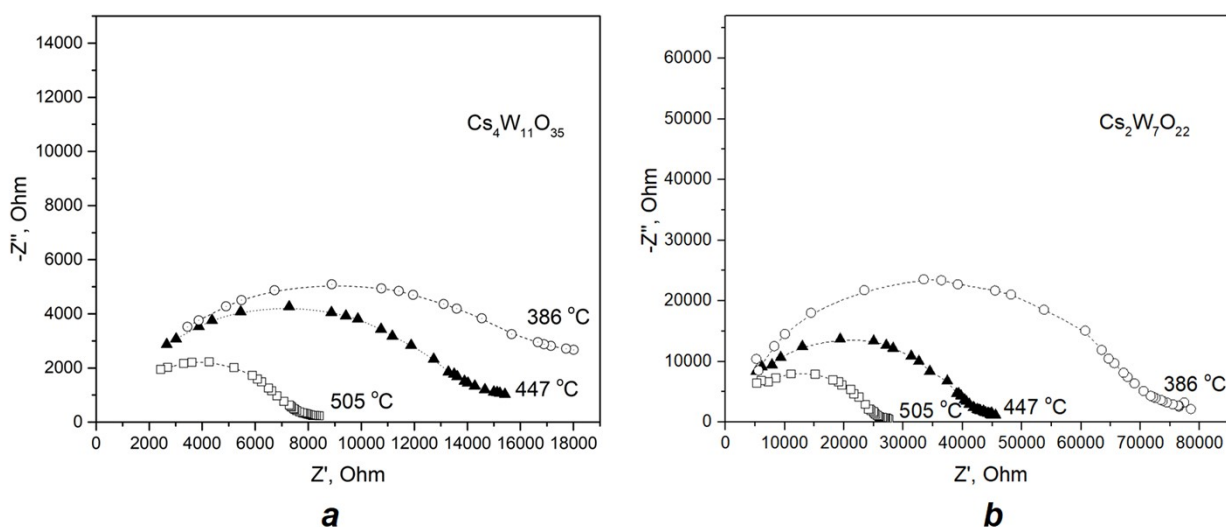

**Figure S6.** Nyquist plots for powder samples of  $\text{Cs}_4\text{W}_{11}\text{O}_{35}$  (a) and  $\text{Cs}_2\text{W}_7\text{O}_{22}$  (b) obtained at various temperatures

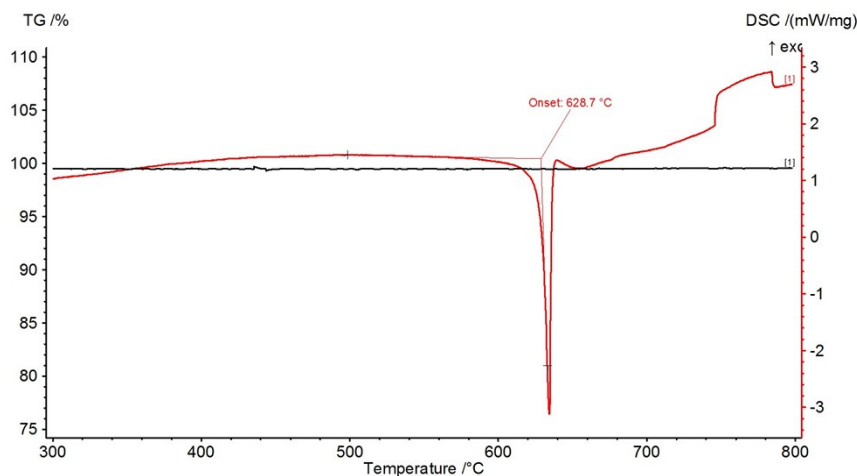

**Figure S7.** DSC-TG curves (STA 449 F1 Jupiter, Netzsch) of  $\text{K}_2\text{W}_2\text{O}_7$

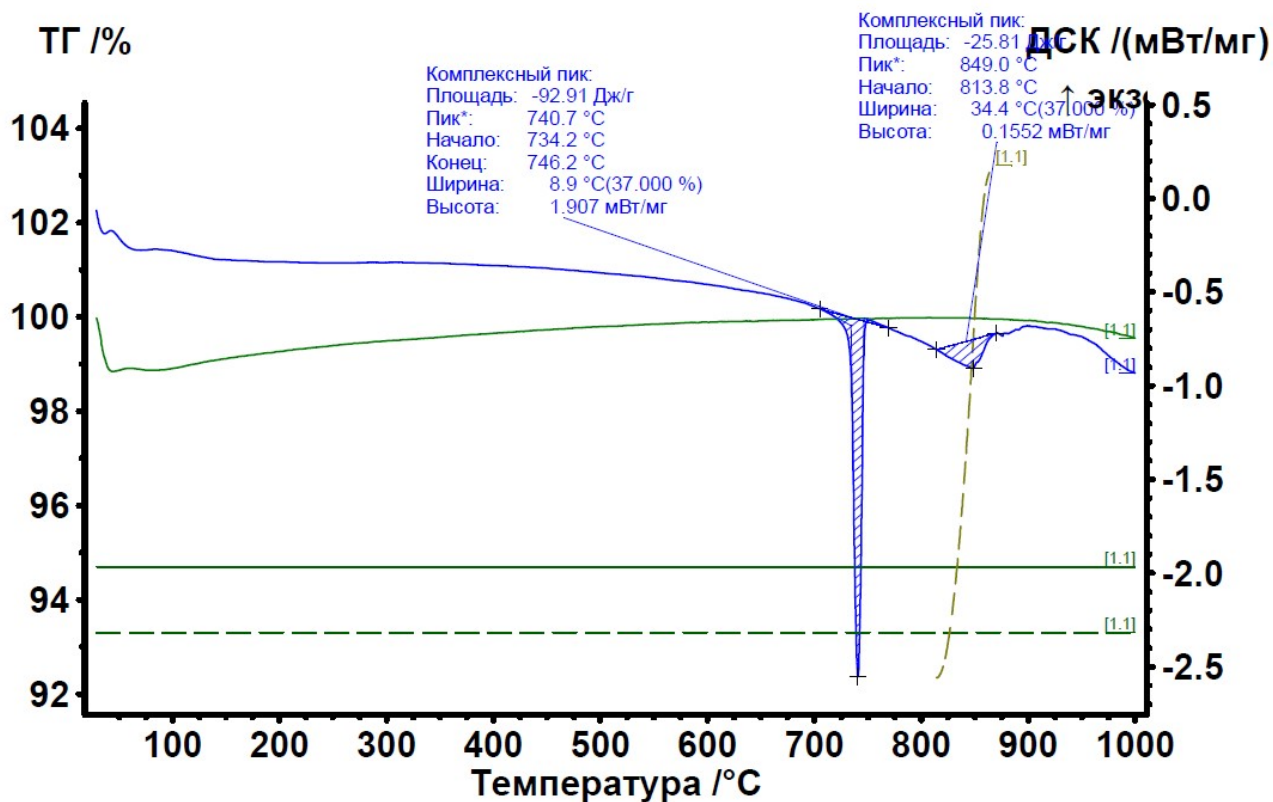

Figure S8. DSC-TG curves (STA 449 F1 Jupiter, Netzsch) of  $K_2W_3O_{10}$

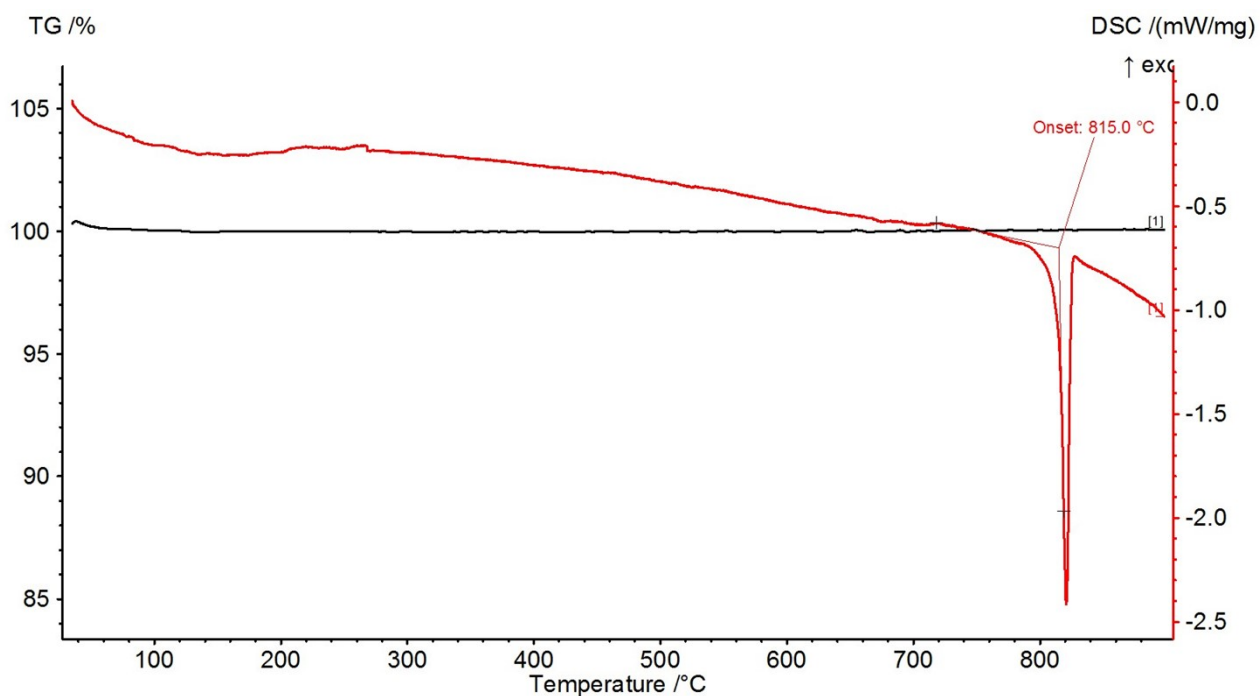

Figure S9. DSC-TG curves (STA 449 F1 Jupiter, Netzsch) of  $K_2W_4O_{13}$

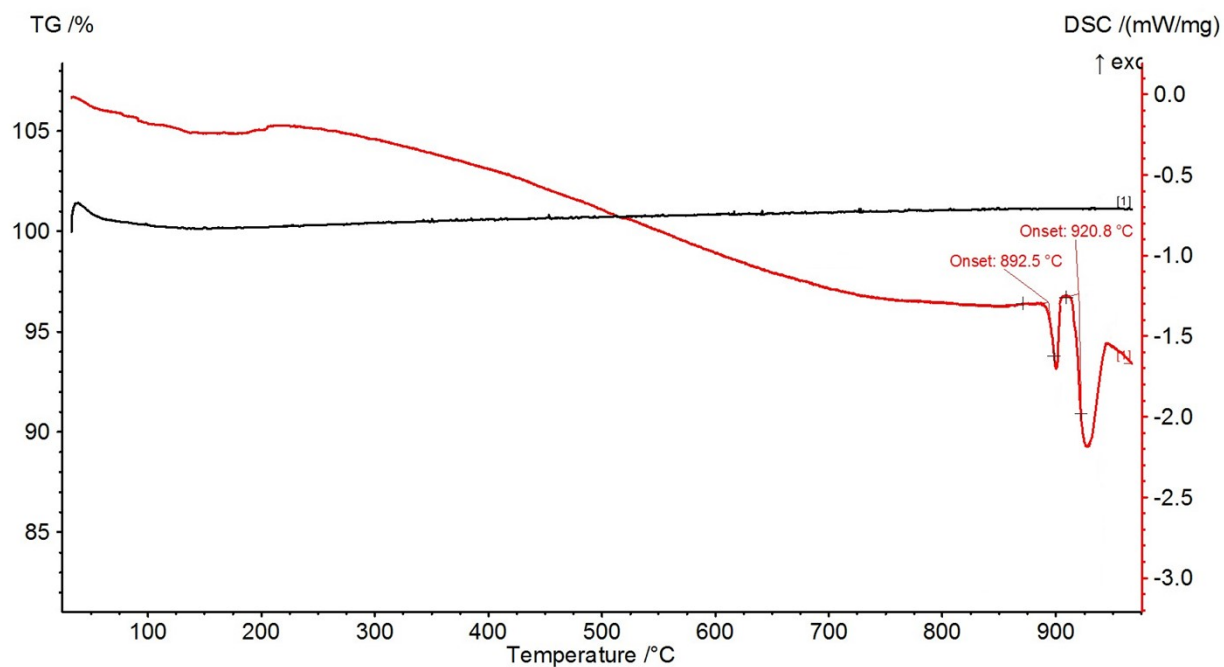

**Figure S10.** DSC-TG curves (STA 449 F1 Jupiter, Netzsch) of  $K_4W_{11}O_{35}$

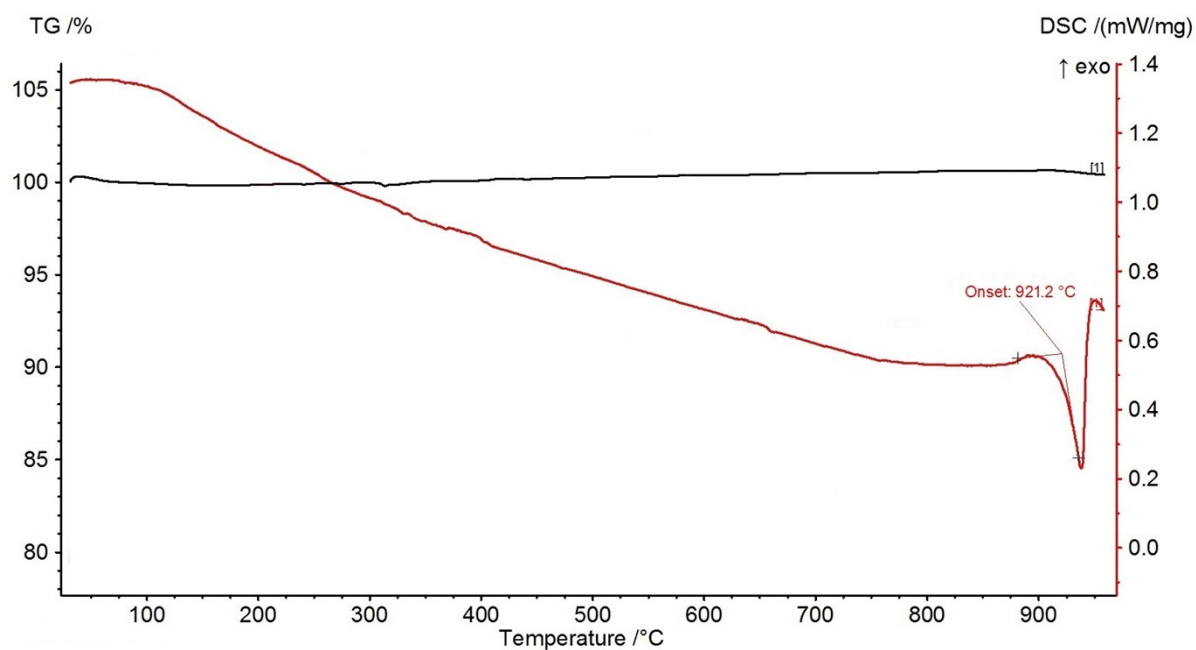

**Figure S11.** DSC-TG curves (STA 449 F1 Jupiter, Netzsch) of  $K_2W_7O_{22}$

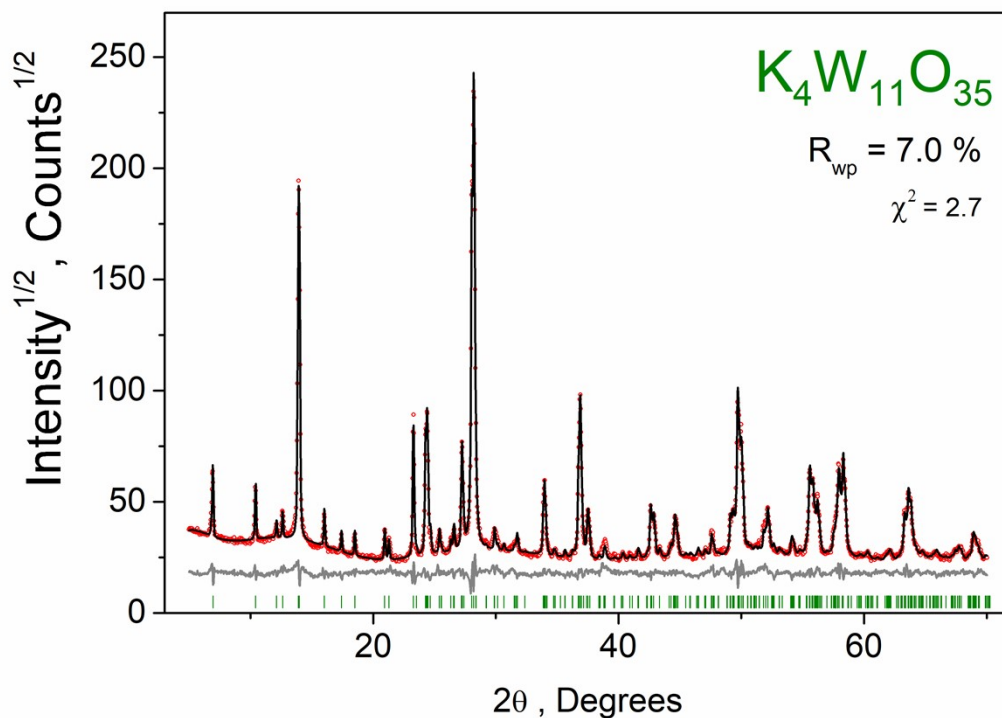

**Figure S12:** Observed, calculated and difference PXR D patterns of  $K_4W_{11}O_{35}$

**Table S1.** Observed and calculated PXR D peaks for  $K_4W_{11}O_{35}$

| No. | $2\theta$ (obs.), ° | $I$ (obs.), % | $2\theta$ (calc.), ° | $I$ (calc.), % | $h, k, l$ |
|-----|---------------------|---------------|----------------------|----------------|-----------|
| 1   | 6.928               | 6             | 6.944                | 5.0            | 0 0 2     |
| 2   | 10.402              | 4             | 10.424               | 3.1            | 0 0 3     |
| 3   | 12.109              | 1             | 12.129               | 0.9            | 0 1 0     |
| 4   | 12.615              | 2             | 12.619               | 1.4            | 0 1 1     |
| 5   | 13.938              | 76            | 13.913               | 41.7           | 0 0 4     |
|     |                     |               | 13.989               | 28.5           | 0 1 2     |
| 6   | 16.013              | 2             | 16.018               | 1.9            | 0 1 3     |
| 7   | 17.408              | 1             | 17.416               | 0.9            | 0 0 5     |
| 8   | 18.493              | 1             | 18.497               | 1.1            | 0 1 4     |
| 9   | 20.934              | 2             | 20.935               | 1.4            | 0 0 6     |
| 10  | 21.278              | 1             | 21.277               | 0.8            | 0 1 5     |
| 11  | 23.275              | 12            | 23.277               | 10.8           | 1 0 0     |
| 12  | 24.267              | 10            | 24.264               | 9.5            | 0 1 6     |
| 13  | 24.403              | 13            | 24.397               | 11.7           | 0 2 0     |
| 14  | 24.645              | 1             | 24.650               | 1.0            | 0 2 1     |
| 15  | 25.383              | 2             | 25.395               | 1.2            | 0 2 2     |
| 16  | 26.559              | 1             | 26.550               | 0.4            | 1 1 1     |
|     |                     |               | 26.557               | 0.3            | -1 1 1    |
|     |                     |               | 26.594               | 0.8            | 0 2 3     |
| 17  | 27.228              | 10            | 27.196               | 2.9            | 1 0 4     |
|     |                     |               | 27.224               | 2.0            | -1 0 4    |



|    |        |     |        |       |         |
|----|--------|-----|--------|-------|---------|
|    |        |     | 27.243 | 1.9   | 1 1 2   |
|    |        |     | 27.257 | 2.9   | -1 1 2  |
| 18 | 28.041 | 68  | 28.037 | 60.3  | 0 0 8   |
| 19 | 28.195 | 100 | 28.192 | 100.0 | 0 2 4   |
| 20 | 29.900 | 2   | 29.874 | 0.7   | 1 1 4   |
|    |        |     | 29.899 | 0.6   | -1 1 4  |
| 21 | 30.128 | < 1 | 30.133 | 0.3   | 0 2 5   |
| 22 | 30.660 | < 1 | 30.648 | 0.4   | 0 1 8   |
| 23 | 31.497 | < 1 | 31.480 | 0.2   | 1 0 6   |
|    |        |     | 31.516 | 0.1   | -1 0 6  |
| 24 | 31.733 | 1   | 31.718 | 0.5   | 1 1 5   |
|    |        |     | 31.748 | 0.5   | -1 1 5  |
| 25 | 33.881 | 4   | 33.850 | 1.3   | 1 1 6   |
|    |        |     | 33.883 | 1.3   | -1 1 6  |
| 26 | 33.978 | 4   | 33.965 | 4.1   | 1 2 0   |
| 27 | 34.697 | < 1 | 34.704 | 0.2   | 1 2 2   |
|    |        |     | 34.715 | 0.1   | -1 2 2  |
| 28 | 34.853 | < 1 | 34.829 | 0.2   | 0 2 7   |
| 29 | 35.626 | < 1 | 35.630 | 0.3   | -1 2 3  |
| 30 | 36.753 | 10  | 36.723 | 3.6   | 1 0 8   |
|    |        |     | 36.765 | 4.5   | -1 0 8  |
| 31 | 36.871 | 16  | 36.855 | 9.1   | 1 2 4   |
|    |        |     | 36.876 | 7.0   | -1 2 4  |
| 32 | 37.151 | < 1 | 37.131 | 0.6   | 0 3 1   |
| 33 | 37.440 | 2   | 37.410 | 1.0   | 0 1 10  |
| 34 | 37.564 | 2   | 37.500 | 2.9   | 0 2 8   |
| 35 | 38.843 | 1   | 38.811 | 0.3   | 1 1 8   |
|    |        |     | 38.851 | 0.3   | -1 1 8  |
| 36 | 38.910 | 1   | 38.911 | 0.3   | 0 0 11  |
| 37 | 40.332 | < 1 | 40.343 | 0.3   | 0 2 9   |
| 38 | 40.898 | < 1 | 40.905 | 0.2   | 0 1 11  |
| 39 | 41.591 | < 1 | 41.577 | 0.3   | 1 1 9   |
|    |        |     | 41.619 | 0.3   | -1 1 9  |
| 40 | 42.604 | 5   | 42.613 | 4.3   | 0 0 12  |
| 41 | 42.849 | 3   | 42.855 | 3.0   | 0 3 6   |
| 42 | 43.338 | 1   | 43.336 | 0.5   | 0 2 10  |
| 43 | 44.273 | 1   | 44.278 | 0.3   | 1 3 1   |
|    |        |     | 44.282 | 0.3   | -1 3 1  |
| 44 | 44.503 | 1   | 44.470 | 0.2   | 0 1 12  |
|    |        |     | 44.500 | 0.4   | 1 1 10  |
|    |        |     | 44.544 | 0.3   | -1 1 10 |
| 45 | 44.595 | 3   | 44.582 | 1.2   | 1 2 8   |
|    |        |     | 44.618 | 1.5   | -1 2 8  |
| 46 | 44.719 | 1   | 44.725 | 0.4   | 1 3 2   |
|    |        |     | 44.734 | 0.3   | -1 3 2  |
| 47 | 44.850 | < 1 | 44.827 | 0.4   | 0 3 7   |

|    |        |     |        |      |         |
|----|--------|-----|--------|------|---------|
| 48 | 46.474 | < 1 | 46.463 | 0.2  | 0 2 11  |
|    |        |     | 46.485 | 0.2  | 1 3 4   |
|    |        |     | 46.503 | 0.2  | -1 3 4  |
| 49 | 47.081 | < 1 | 47.070 | 0.2  | 1 2 9   |
| 50 | 47.577 | 2   | 47.569 | 1.4  | 2 0 0   |
| 51 | 49.122 | 3   | 49.084 | 1.7  | 1 0 12  |
|    |        |     | 49.134 | 2.2  | -1 0 12 |
| 52 | 49.321 | 2   | 49.314 | 1.6  | 1 3 6   |
|    |        |     | 49.338 | 0.8  | -1 3 6  |
| 53 | 49.439 | 1   | 49.413 | 0.3  | 2 1 1   |
|    |        |     | 49.416 | 0.2  | 0 3 9   |
| 54 | 49.708 | 22  | 49.710 | 25.2 | 0 2 12  |
| 55 | 49.815 | 5   | 49.779 | 0.2  | -1 2 10 |
|    |        |     | 49.791 | 0.4  | 2 0 4   |
|    |        |     | 49.823 | 0.3  | 2 1 2   |
|    |        |     | 49.824 | 0.2  | -2 0 4  |
|    |        |     | 49.839 | 0.5  | -2 1 2  |
| 56 | 50.007 | 13  | 49.997 | 12.4 | 0 4 0   |
| 57 | 50.144 | 1   | 50.164 | 0.2  | 0 0 14  |
| 58 | 51.442 | < 1 | 51.446 | 0.3  | 2 1 4   |
|    |        |     | 51.478 | 0.2  | -2 1 4  |
| 59 | 51.800 | 2   | 51.810 | 1.9  | 0 1 14  |
| 60 | 51.993 | 2   | 51.996 | 1.0  | 0 3 10  |
| 61 | 52.157 | 4   | 52.157 | 3.9  | 0 4 4   |
| 62 | 53.120 | < 1 | 53.085 | 0.2  | 1 3 8   |
|    |        |     | 53.116 | 0.2  | -1 3 8  |
| 63 | 53.323 | < 1 | 53.345 | 0.2  | 0 4 5   |
| 64 | 54.067 | 1   | 54.069 | 0.3  | 1 1 13  |
|    |        |     | 54.077 | 0.3  | 2 1 6   |
| 65 | 54.188 | 1   | 54.168 | 0.4  | 2 2 0   |
| 66 | 55.579 | 12  | 55.552 | 5.4  | 1 2 12  |
|    |        |     | 55.598 | 5.7  | -1 2 12 |
| 67 | 55.842 | 7   | 55.840 | 6.1  | 1 4 0   |
| 68 | 56.124 | 1   | 56.098 | 0.6  | 2 0 8   |
|    |        |     | 56.158 | 1.0  | -2 0 8  |
| 69 | 56.210 | 6   | 56.200 | 2.3  | 2 2 4   |
|    |        |     | 56.231 | 1.7  | -2 2 4  |
| 70 | 57.520 | 2   | 57.498 | 0.9  | 1 1 14  |
|    |        |     | 57.550 | 0.6  | -1 1 14 |
| 71 | 57.700 | 2   | 57.678 | 0.5  | 1 3 10  |
|    |        |     | 57.715 | 0.6  | -1 3 10 |
| 72 | 57.929 | 13  | 57.956 | 8.2  | 0 0 16  |
| 73 | 58.302 | 16  | 58.300 | 13.6 | 0 4 8   |
| 74 | 63.282 | 6   | 63.277 | 2.5  | 1 0 16  |
|    |        |     | 63.333 | 2.3  | -1 0 16 |
| 75 | 63.579 | 4   | 63.617 | 3.7  | 1 4 8   |

|    |        |     |        |     |         |
|----|--------|-----|--------|-----|---------|
| 76 | 63.640 | 5   | 63.645 | 4.0 | -1 4 8  |
| 77 | 63.791 | 2   | 63.815 | 2.2 | 0 2 16  |
| 78 | 64.226 | 1   | 64.241 | 0.7 | 0 5 2   |
| 79 | 64.728 | 1   | 64.700 | 0.2 | 1 1 16  |
|    |        |     | 64.755 | 0.1 | -1 1 16 |
| 80 | 64.806 | < 1 | 64.823 | 0.2 | 0 5 3   |
| 81 | 65.779 | < 1 | 65.796 | 0.2 | -2 0 12 |
| 82 | 67.735 | 1   | 67.742 | 0.9 | 0 4 12  |
| 83 | 67.910 | < 1 | 67.919 | 0.3 | 0 5 6   |
| 84 | 68.905 | 2   | 68.876 | 1.2 | 1 2 16  |
|    |        |     | 68.930 | 1.2 | -1 2 16 |

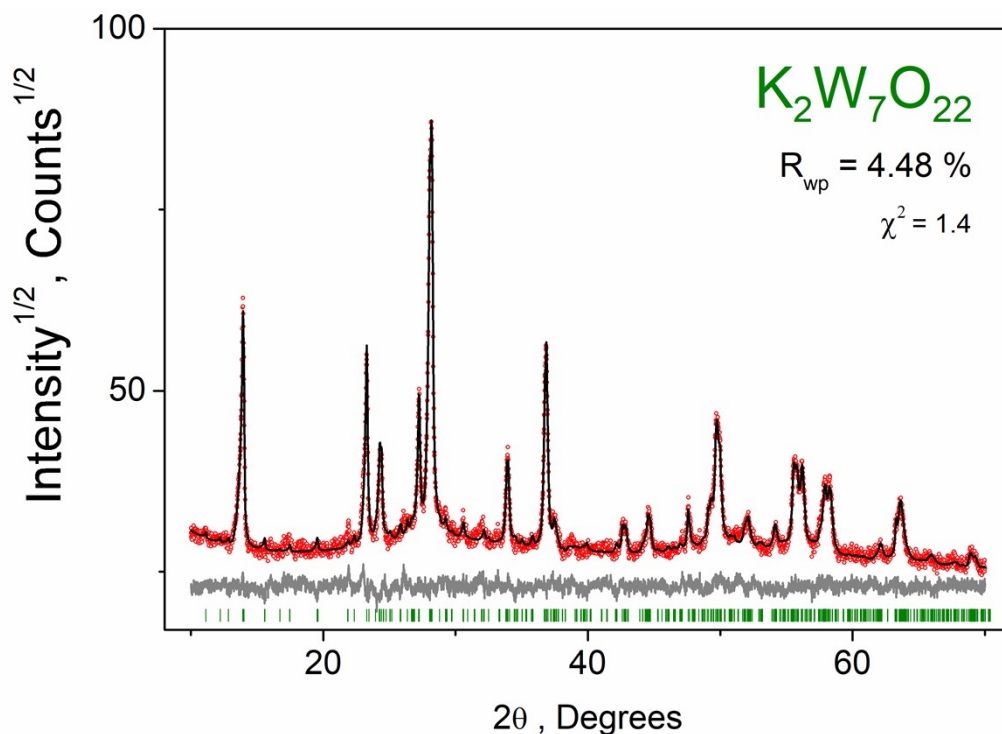

**Figure S13:** Observed, calculated and difference PXRD patterns of  $K_2W_7O_{22}$

**Table S2.** Observed and calculated PXRD peaks for  $K_2W_7O_{22}$

| No. | $2\theta$ (obs.), ° | $I$ (obs.), % | $2\theta$ (calc.), ° | $I$ (calc.), % | $h, k, l$ |
|-----|---------------------|---------------|----------------------|----------------|-----------|
| 1   | 11.109              | 1             | 11.120               | 0.7            | 0 0 4     |
| 2   | 12.179              | < 1           | 12.202               | 0.4            | 1 0 0     |
|     |                     |               | 12.207               | 0.1            | -1 0 1    |
| 3   | 13.951              | 66            | 13.912               | 26.0           | 0 0 5     |
|     |                     |               | 13.973               | 12.6           | 1 0 2     |
|     |                     |               | 13.996               | 12.6           | -1 0 3    |
| 4   | 17.455              | 1             | 17.442               | 0.3            | 1 0 4     |
|     |                     |               | 17.476               | 0.5            | -1 0 5    |

|    |        |     |        |       |         |
|----|--------|-----|--------|-------|---------|
| 5  | 19.544 | 1   | 19.523 | 0.9   | 0 0 7   |
|    |        |     | 19.557 | 0.6   | 1 0 5   |
| 6  | 21.829 | < 1 | 21.837 | 0.3   | 1 0 6   |
| 7  | 21.918 | 1   | 21.876 | 0.4   | -1 0 7  |
| 8  | 23.285 | 42  | 23.271 | 34.8  | 0 1 0   |
| 9  | 24.258 | 9   | 24.239 | 5.4   | 1 0 7   |
|    |        |     | 24.280 | 5.3   | -1 0 8  |
| 10 | 24.378 | 8   | 24.388 | 11.0  | -2 0 1  |
| 11 | 27.227 | 23  | 27.213 | 12.7  | 0 1 5   |
|    |        |     | 27.245 | 6.0   | 1 1 2   |
|    |        |     | 27.258 | 5.3   | -1 1 3  |
| 12 | 28.028 | 61  | 28.034 | 53.5  | 0 0 10  |
| 13 | 28.183 | 100 | 28.160 | 100.0 | 2 0 4   |
|    |        |     | 28.207 |       | -2 0 6  |
| 14 | 29.229 | 2   | 29.230 | 1.1   | 1 1 4   |
|    |        |     | 29.251 | 0.6   | -1 1 5  |
| 15 | 30.592 | 2   | 30.554 | 0.5   | 0 1 7   |
|    |        |     | 30.576 | 0.4   | 1 1 5   |
|    |        |     | 30.600 | 1.3   | -1 1 6  |
| 16 | 32.114 | 1   | 32.125 | 0.6   | 1 1 6   |
|    |        |     | 32.152 | 1.0   | -1 1 7  |
| 17 | 33.868 | 9   | 33.851 | 3.6   | 1 1 7   |
|    |        |     | 33.881 | 4.9   | -1 1 8  |
| 18 | 33.960 | 13  | 33.961 | 8.6   | -2 1 1  |
| 19 | 36.739 | 23  | 36.744 | 18.1  | 0 1 10  |
| 20 | 36.863 | 32  | 36.843 | 17.1  | 2 1 4   |
|    |        |     | 36.880 | 17.4  | -2 1 6  |
| 21 | 37.402 | 2   | 37.382 | 0.5   | 1 0 12  |
|    |        |     | 37.428 | 0.8   | -1 0 13 |
| 22 | 37.499 | 4   | 37.455 | 1.7   | 2 0 9   |
|    |        |     | 37.529 | 1.6   | -2 0 11 |
| 23 | 37.768 | 2   | 37.755 | 0.3   | 1 1 9   |
|    |        |     | 37.790 | 0.6   | -1 1 10 |
| 24 | 42.608 | 4   | 42.608 | 3.7   | 0 0 15  |
| 25 | 42.861 | 3   | 42.805 | 1.9   | 3 0 6   |
|    |        |     | 42.878 | 2.1   | -3 0 9  |
| 26 | 44.579 | 6   | 44.540 | 0.9   | -1 1 13 |
|    |        |     | 44.563 | 1.8   | 2 1 9   |
|    |        |     | 44.627 | 2.0   | -2 1 11 |
| 27 | 44.717 | 2   | 44.708 | 1.1   | 3 1 1   |
| 28 | 46.460 | < 1 | 46.475 | 0.3   | 0 1 14  |
| 29 | 47.579 | 7   | 47.578 | 5.7   | 0 2 0   |
| 30 | 49.111 | 5   | 49.107 | 4.7   | 0 1 15  |
| 31 | 49.332 | 5   | 49.283 | 2.5   | 3 1 6   |
|    |        |     | 49.308 | 0.9   | 1 2 0   |
|    |        |     | 49.349 | 2.0   | -3 1 9  |

|    |        |    |        |      |         |
|----|--------|----|--------|------|---------|
| 32 | 49.693 | 27 | 49.657 | 12.7 | 2 0 14  |
|    |        |    | 49.745 | 12.6 | 2 0 16  |
| 33 | 49.842 | 9  | 49.815 | 3.4  | 0 2 5   |
|    |        |    | 49.835 | 1.6  | 1 2 2   |
|    |        |    | 49.842 | 1.1  | -1 2 3  |
| 34 | 49.974 | 14 | 49.978 | 12.7 | -4 0 2  |
| 35 | 51.082 | 2  | 51.053 | 0.9  | 1 2 4   |
|    |        |    | 51.066 | 0.2  | -1 2 5  |
| 36 | 51.786 | 2  | 51.778 | 1.0  | 1 0 17  |
|    |        |    | 51.828 | 0.8  | -1 0 18 |
| 37 | 52.140 | 4  | 52.110 | 0.5  | -1 1 16 |
|    |        |    | 52.110 | 1.7  | 4 0 3   |
|    |        |    | 52.167 | 1.7  | -4 0 7  |
| 38 | 54.092 | 3  | 54.096 | 0.5  | 1 2 7   |
|    |        |    | 54.117 | 1.7  | -1 2 8  |
| 39 | 54.200 | 2  | 54.172 | 1.7  | -2 2 1  |
| 40 | 55.560 | 20 | 55.528 | 9.3  | 2 1 14  |
|    |        |    | 55.609 | 9.4  | -2 1 16 |
| 41 | 55.822 | 12 | 55.824 | 11.4 | -4 1 2  |
| 42 | 56.192 | 17 | 56.205 | 6.4  | 2 2 4   |
|    |        |    | 56.232 | 6.6  | -2 2 6  |
| 43 | 57.853 | 6  | 57.806 | 3.9  | 4 1 3   |
|    |        |    | 57.859 | 3.4  | -4 1 7  |
| 44 | 57.939 | 8  | 57.949 | 8.1  | 0 0 20  |
| 45 | 58.268 | 8  | 58.228 | 7.4  | 4 0 8   |
| 46 | 62.114 | 2  | 62.069 | 0.8  | 2 2 9   |
|    |        |    | 62.119 | 1.0  | -2 2 11 |
|    |        |    | 62.135 | 0.4  | 4 1 7   |
| 47 | 63.267 | 7  | 63.300 | 6.4  | 0 1 20  |
| 48 | 63.534 | 6  | 63.565 | 6.4  | 4 1 8   |
| 49 | 63.659 | 7  | 63.665 | 6.3  | -4 1 12 |
| 50 | 68.893 | 4  | 68.846 | 1.5  | 2 1 19  |
|    |        |    | 68.926 | 0.4  | 3 1 16  |
|    |        |    | 68.942 | 1.5  | -2 1 21 |

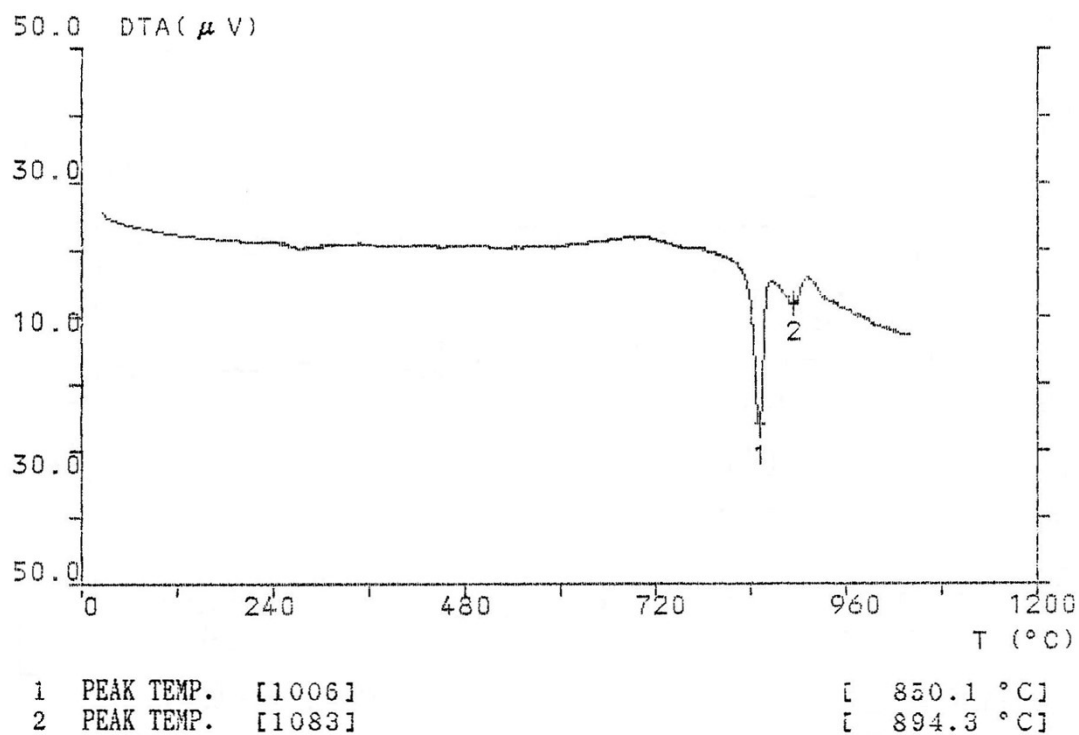

**Figure S14:** DTA curve (TA-7000, Hitachi) of  $\text{Rb}_2\text{W}_3\text{O}_{10}$

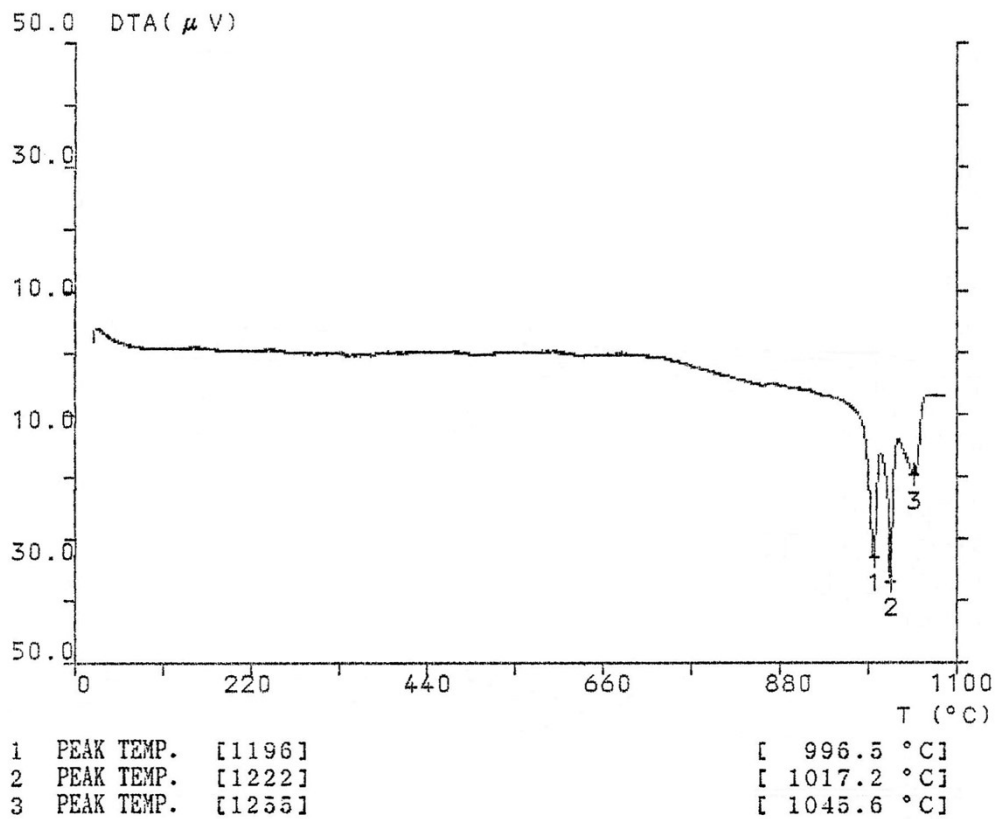

**Figure S15:** DTA curve (TA-7000, Hitachi) of  $\text{Rb}_4\text{W}_{11}\text{O}_{35}$

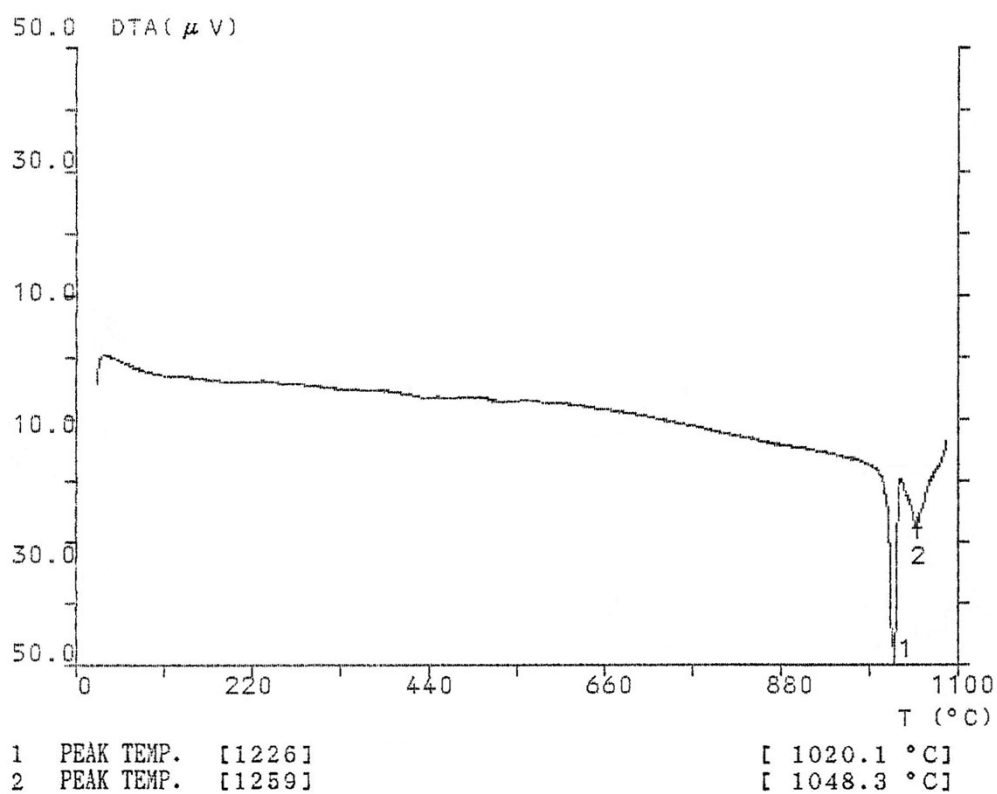

**Figure S16:** DTA curve (TA-7000, Hitachi) of  $Rb_2W_7O_{22}$

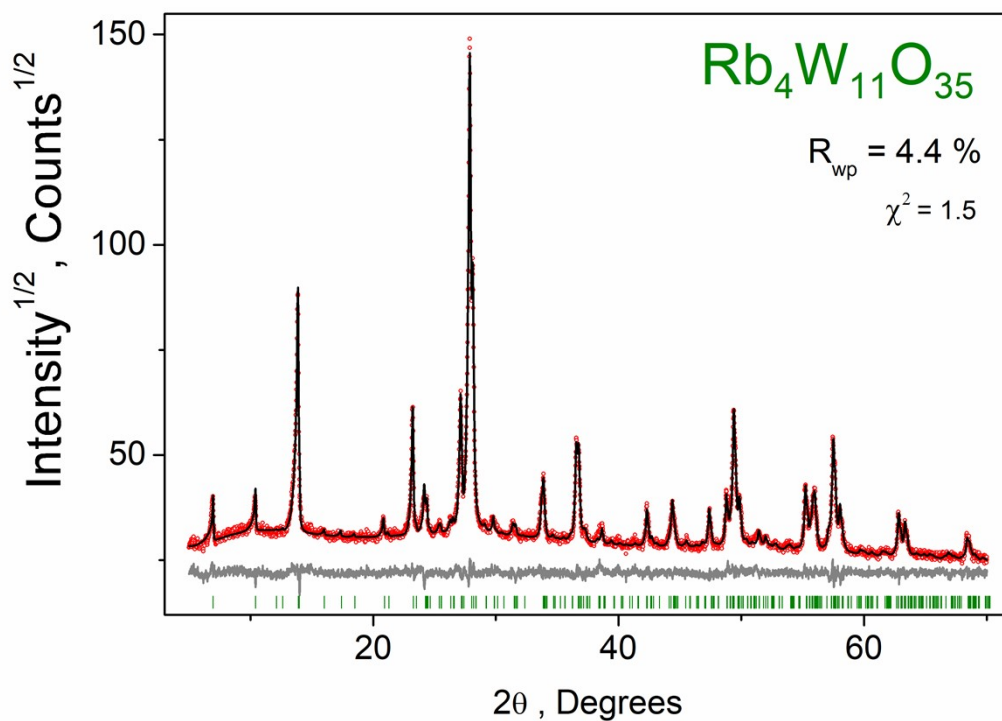

**Figure S17:** Observed, calculated and difference PXRD patterns of  $Rb_4W_{11}O_{35}$

**Table S3.** Observed and calculated PXRD peaks for  $\text{Rb}_4\text{W}_{11}\text{O}_{35}$ 

| No. | $2\theta$ (obs.), ° | $I$ , % | $2\theta$ (calc.), ° | $I$ , % | $h, k, l$ |
|-----|---------------------|---------|----------------------|---------|-----------|
| 1   | 6.881               | 4       | 6.886                | 3.9     | 0 0 2     |
| 2   | 10.330              | 4       | 10.337               | 3.7     | 0 0 3     |
| 3   | 13.824              | 40      | 13.797               | 32.3    | 0 0 4     |
| 4   | 15.918              | 1       | 15.924               | 0.5     | 0 1 3     |
| 5   | 20.762              | 2       | 20.759               | 1.4     | 0 0 6     |
| 6   | 23.166              | 13      | 23.163               | 13.1    | 1 0 0     |
| 7   | 24.081              | 3       | 24.086               | 3.7     | 0 1 6     |
| 8   | 24.295              | 3       | 24.297               | 2.6     | 0 2 0     |
| 9   | 25.289              | 1       | 25.282               | 0.4     | 0 2 2     |
| 10  | 25.420              | 1       | 25.412               | 0.5     | 1 0 3     |
| 11  | 26.211              | 1       | 26.191               | 0.7     | 1 1 0     |
| 12  | 26.433              | 2       | 26.424               | 0.5     | 1 1 1     |
| 13  | 27.067              | 14      | 27.049               | 5.9     | 1 0 4     |
|     |                     |         | 27.050               | 5.9     | -1 0 4    |
|     |                     |         | 27.112               | 2.5     | 1 1 2     |
|     |                     |         | 27.113               | 2.2     | -1 1 2    |
| 14  | 27.806              | 100     | 27.800               | 100.0   | 0 0 8     |
| 15  | 28.049              | 36      | 28.042               | 36.9    | 0 2 4     |
| 16  | 29.040              | 1       | 29.028               | 1.3     | -1 0 5    |
| 17  | 29.716              | 2       | 29.718               | 0.6     | 1 1 4     |
|     |                     |         | 29.719               | 0.7     | -1 1 4    |
| 18  | 29.961              | 1       | 29.958               | 0.2     | 0 2 5     |
| 19  | 31.320              | 1       | 31.289               | 0.2     | 1 0 6     |
|     |                     |         | 31.291               | 0.2     | -1 0 6    |
|     |                     |         | 31.359               | 0.6     | 0 0 9     |
| 20  | 31.539              | 1       | 31.543               | 0.7     | 1 1 5     |
| 21  | 33.663              | 2       | 33.653               | 1.0     | 1 1 6     |
|     |                     |         | 33.654               | 1.3     | -1 1 6    |
| 22  | 33.821              | 5       | 33.809               | 5.0     | 1 2 0     |
| 23  | 36.488              | 9       | 36.480               | 4.4     | 1 0 8     |
|     |                     |         | 36.482               | 4.8     | -1 0 8    |
| 24  | 36.690              | 7       | 36.674               | 4.6     | 1 2 4     |
|     |                     |         | 36.675               | 4.7     | -1 2 4    |
| 25  | 37.253              | 1       | 37.235               | 0.7     | 0 2 8     |
| 26  | 38.570              | 1       | 38.575               | 1.0     | 0 0 11    |
| 27  | 42.233              | 3       | 42.242               | 3.4     | 0 0 12    |
| 28  | 44.322              | 4       | 44.317               | 1.9     | 1 2 8     |
|     |                     |         | 44.318               | 2.4     | -1 2 8    |
| 29  | 47.329              | 3       | 47.321               | 3.6     | 2 0 0     |
| 30  | 48.718              | 6       | 48.716               | 2.5     | 1 0 12    |
|     |                     |         | 48.718               | 2.7     | -1 0 12   |
| 31  | 49.098              | 3       | 49.060               | 0.8     | 1 3 6     |
|     |                     |         | 49.061               | 0.7     | -1 3 6    |



|    |        |    |        |      |         |
|----|--------|----|--------|------|---------|
| 32 | 49.324 | 20 | 49.327 | 19.0 | 0 2 12  |
| 33 | 49.785 | 5  | 49.781 | 4.5  | 0 4 0   |
| 34 | 51.341 | 2  | 51.363 | 1.6  | 0 1 14  |
| 35 | 51.901 | 1  | 51.915 | 1.1  | 0 4 4   |
| 36 | 55.168 | 7  | 55.165 | 3.6  | 1 2 12  |
|    |        |    | 55.166 | 3.9  | -1 2 12 |
| 37 | 55.619 | 2  | 55.585 | 1.7  | 1 4 0   |
| 38 | 55.777 | 4  | 55.772 | 2.0  | 2 0 8   |
|    |        |    | 55.774 | 2.1  | -2 0 8  |
| 39 | 55.905 | 4  | 55.912 | 2.2  | 2 2 4   |
|    |        |    | 55.913 | 2.2  | -2 2 4  |
| 40 | 57.050 | 1  | 57.052 | 0.8  | 1 1 14  |
|    |        |    | 57.054 | 0.9  | -1 1 14 |
| 41 | 57.412 | 14 | 57.430 | 14.9 | 0 0 16  |
| 42 | 57.550 | 2  | 57.566 | 0.6  | 1 4 4   |
|    |        |    | 57.566 | 0.6  | -1 4 4  |
| 43 | 57.950 | 4  | 57.968 | 5.1  | 0 4 8   |
| 44 | 62.741 | 4  | 62.716 | 2.5  | 1 0 16  |
| 45 | 63.284 | 3  | 63.271 | 1.3  | 1 4 8   |
|    |        |    | 63.272 | 1.1  | 0 2 16  |
|    |        |    | 63.272 | 1.3  | -1 4 8  |
| 46 | 68.318 | 2  | 68.331 | 1.1  | 1 2 16  |
|    |        |    | 68.333 | 1.2  | -1 2 16 |

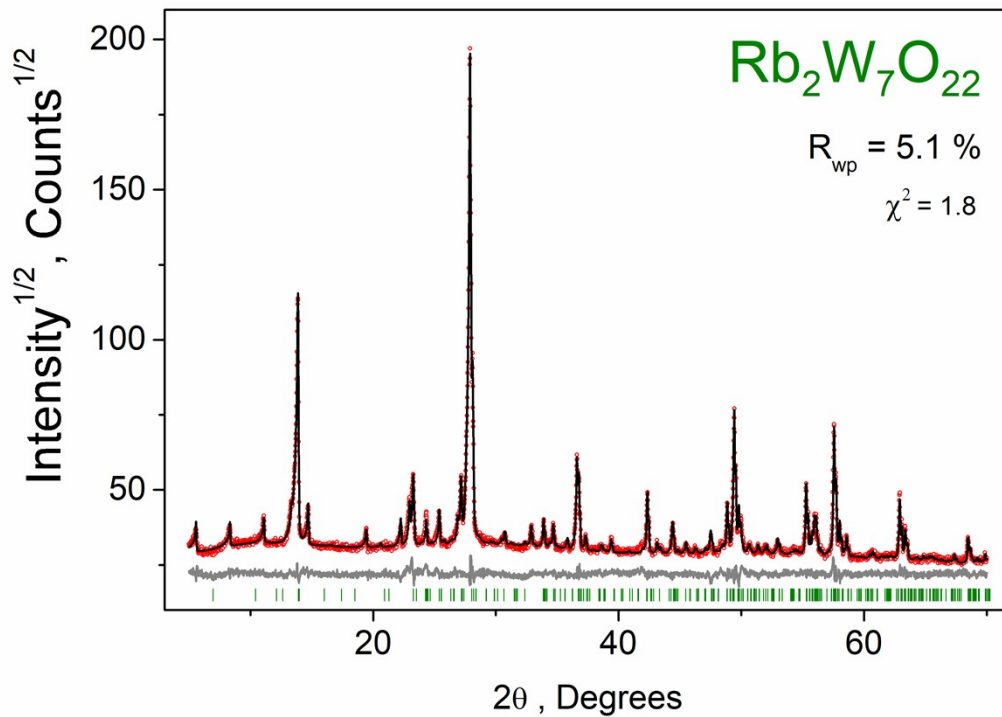

**Figure S18:** Observed, calculated and difference PXRD patterns of Rb<sub>2</sub>W<sub>7</sub>O<sub>22</sub>

**Table S4.** Observed and calculated PXRD peaks for  $\text{Rb}_2\text{W}_7\text{O}_{22}$

| No. | $2\theta$ (obs.), ° | $I$ (obs.), % | $2\theta$ (calc.), ° | $I$ (calc.), % | $h, k, l$ |
|-----|---------------------|---------------|----------------------|----------------|-----------|
| 1   | 5.530               | 3             | 5.514                | 2.4            | 0 0 2     |
| 2   | 8.270               | 2             | 8.276                | 1.9            | 0 0 3     |
| 3   | 11.042              | 3             | 11.042               | 2.2            | 0 0 4     |
| 4   | 13.294              | 2             | 13.280               | 1.2            | 0 1 2     |
| 5   | 13.820              | 39            | 13.814               | 40.2           | 0 0 5     |
| 6   | 14.650              | 3             | 14.654               | 3.0            | 0 1 3     |
| 7   | 19.394              | 1             | 19.386               | 1.1            | 0 0 7     |
| 8   | 22.191              | 1             | 22.188               | 1.8            | 0 0 8     |
| 9   | 22.900              | 3             | 22.899               | 2.8            | 0 1 7     |
| 10  | 23.214              | 7             | 23.214               | 6.6            | 1 0 0     |
| 11  | 24.279              | 3             | 24.280               | 1.7            | 0 2 0     |
| 12  | 25.327              | 2             | 25.333               | 2.4            | 0 1 8     |
| 13  | 26.816              | 1             | 26.833               | 0.6            | 1 1 2     |
|     |                     |               | 26.841               | 0.7            | -1 1 2    |
| 14  | 27.108              | 4             | 27.103               | 2.8            | 1 0 5     |
|     |                     |               | 27.123               | 2.3            | -1 0 5    |
| 15  | 27.842              | 100           | 27.835               | 100.0          | 0 0 10    |
| 16  | 28.042              | 18            | 28.040               | 18.1           | 0 2 5     |
| 17  | 30.431              | < 1           | 30.407               | 0.2            | 1 0 7     |
| 18  | 30.674              | 1             | 30.683               | 0.8            | 0 0 11    |
| 19  | 32.845              | 2             | 32.824               | 0.6            | 1 1 7     |
|     |                     |               | 32.847               | 0.7            | -1 1 7    |
| 20  | 33.852              | 2             | 33.842               | 1.5            | 1 2 0     |
| 21  | 34.628              | 2             | 34.614               | 0.7            | 1 1 8     |
|     |                     |               | 34.639               | 0.7            | -1 1 8    |
| 22  | 35.755              | 1             | 35.779               | 0.6            | 0 1 12    |
| 23  | 36.561              | 7             | 36.535               | 3.1            | 1 0 10    |
|     |                     |               | 36.566               | 3.4            | -1 0 10   |
| 24  | 36.722              | 5             | 36.704               | 2.4            | 1 2 5     |
|     |                     |               | 36.719               | 2.2            | -1 2 5    |
| 25  | 37.257              | 1             | 37.265               | 0.8            | 0 2 10    |
| 26  | 38.499              | < 1           | 38.524               | 0.3            | 0 1 13    |
| 27  | 39.359              | 1             | 39.356               | 0.7            | 0 0 14    |
| 28  | 42.308              | 4             | 42.297               | 4.5            | 0 0 15    |
| 29  | 43.387              | < 1           | 43.371               | 0.4            | 0 3 8     |
| 30  | 44.368              | 2             | 44.323               | 0.3            | 1 3 2     |
|     |                     |               | 44.328               | 0.3            | -1 3 2    |
|     |                     |               | 44.354               | 0.6            | 1 2 10    |
|     |                     |               | 44.380               | 0.8            | -1 2 10   |
| 31  | 45.462              | < 1           | 45.445               | 0.3            | 1 1 13    |
| 32  | 46.187              | < 1           | 46.173               | 0.2            | 1 0 14    |
| 33  | 47.470              | 1             | 47.457               | 1.6            | 2 0 0     |
| 34  | 48.266              | < 1           | 48.270               | 0.2            | 0 0 17    |

|    |        |     |        |      |         |
|----|--------|-----|--------|------|---------|
| 35 | 48.813 | 3   | 48.780 | 1.5  | 1 0 15  |
|    |        |     | 48.817 | 2.0  | -1 0 15 |
| 36 | 49.376 | 14  | 49.367 | 14.6 | 0 2 15  |
| 33 | 49.752 | 2   | 49.746 | 2.5  | 0 4 0   |
| 37 | 49.944 | 2   | 49.946 | 0.9  | 0 1 17  |
| 38 | 51.314 | < 1 | 51.308 | 0.4  | 0 0 18  |
| 39 | 51.894 | < 1 | 51.884 | 0.2  | 0 4 5   |
| 40 | 52.021 | < 1 | 52.023 | 0.4  | 0 2 16  |
| 41 | 52.912 | 1   | 52.914 | 0.9  | 0 1 18  |
| 42 | 55.233 | 5   | 55.215 | 2.6  | 1 2 15  |
|    |        |     | 55.249 | 2.9  | -1 2 15 |
| 43 | 55.585 | 1   | 55.583 | 0.8  | 1 4 0   |
| 44 | 55.766 | 1   | 55.749 | 0.4  | 1 1 17  |
|    |        |     | 55.787 | 0.4  | -1 1 17 |
| 45 | 55.918 | 2   | 55.891 | 1.0  | 2 0 10  |
|    |        |     | 55.936 | 1.0  | -2 0 10 |
| 46 | 56.036 | 2   | 56.019 | 1.0  | 2 2 5   |
|    |        |     | 56.041 | 0.9  | -2 2 5  |
| 47 | 56.405 | < 1 | 56.386 | 0.2  | 1 3 12  |
|    |        |     | 56.412 | 0.2  | -1 3 12 |
| 48 | 57.502 | 14  | 57.507 | 12.1 | 0 0 20  |
| 49 | 57.949 | 2   | 57.962 | 2.2  | 0 4 10  |
| 50 | 58.519 | 1   | 58.511 | 0.6  | 1 1 18  |
|    |        |     | 58.549 | 0.5  | -1 1 18 |
| 51 | 62.856 | 4   | 62.835 | 2.4  | 1 0 20  |
|    |        |     | 62.876 | 2.2  | -1 0 20 |
| 52 | 63.298 | 2   | 63.277 | 0.5  | 1 4 10  |
|    |        |     | 63.298 | 0.5  | -1 4 10 |
|    |        |     | 63.337 | 1.0  | 0 2 20  |
| 53 | 68.420 | 1   | 68.402 | 0.8  | 1 2 20  |
|    |        |     | 68.441 | 0.9  | -1 2 20 |

**Table S5.** Atomic coordinates ( $\times 10^4$ ), site occupancies and equivalent isotropic displacement parameters ( $\text{\AA}^2 \times 10^3$ ) for  $\text{K}_4\text{W}_{11}\text{O}_{35}$ .  $U_{eq}$  is defined as 1/3 of the trace of the orthogonalised  $U_{ij}$  tensor

| Atom   | Occupancy | $x/a$      | $y/b$     | $z/c$      | $U_{eq}$ |
|--------|-----------|------------|-----------|------------|----------|
| W(1)   | 0.5       | 5933(14)   | 0         | -1(3)      | 18.6(10) |
| W(2)   |           | 4818(12)   | 7523(10)  | 1234.8(12) | 34.1(7)  |
| W(3)   |           | 5447(4)    | 2569(11)  | 1240.4(14) | 18.7(6)  |
| W(4)   |           | 4586(10)   | 5038(9)   | 2509.9(5)  | 29.2(7)  |
| W(5)   |           | 5023(5)    | 2446(8)   | 3766.1(10) | 5.4(3)   |
| W(6A)  | 0.576(9)  | 6098(12)   | 7535(12)  | 3787.4(19) | 21.1(11) |
| W(6B)  | 0.424(9)  | 3693(14)   | 7539(14)  | 3744(3)    | 21.0(15) |
| K(1)   | 0.834(4)  | 1040(40)   | -40(50)   | 2539(4)    | 32(3)    |
| K(2)   | 0.409(4)  | 1070(60)   | 4940(50)  | -23(9)     | 18(4)    |
| K(3)   |           | 0          | 70(60)    | 5000       | 56(5)    |
| K(4)   | 0.258(4)  | 6470(80)   | 4950(60)  | 5049(15)   | 6(6)     |
| O(1)   | 0.5       | 10500(300) | -630(70)  | 30(60)     | 41(19)   |
| O(2)   |           | 5680(80)   | 1810(40)  | 510(13)    | 18(6)    |
| O(3)   |           | 5750(90)   | -1810(40) | 511(15)    | 25(7)    |
| O(4)   |           | 620(30)    | 7770(30)  | 1247(8)    | -1(4)    |
| O(5)   |           | 4310(90)   | 6830(40)  | 1930(13)   | 21(6)    |
| O(6)   |           | 5580(70)   | 10020(50) | 1420(7)    | 21(4)    |
| O(7)   |           | 4730(80)   | 5010(50)  | 1006(8)    | 24(4)    |
| O(8)   |           | 1140(50)   | 2800(30)  | 1214(8)    | 0(4)     |
| O(9)   |           | 4400(80)   | 3230(40)  | 1924(13)   | 19(6)    |
| O(10)  |           | 8800(300)  | 4900(300) | 2370(20)   | 140(30)  |
| O(11)  |           | 5500(100)  | 6870(50)  | 2948(15)   | 28(7)    |
| O(12)  |           | 5720(80)   | 3090(40)  | 2968(13)   | 21(6)    |
| O(13)  |           | 9500(200)  | 2370(90)  | 3630(20)   | 90(20)   |
| O(14)  |           | 4270(100)  | 1930(50)  | 4422(16)   | 30(7)    |
| O(15)  |           | 5460(80)   | 5000(50)  | 3855(8)    | 24(4)    |
| O(16)  |           | 4570(70)   | 10(50)    | 3501(7)    | 17(4)    |
| O(17)  |           | 4320(90)   | 8100(40)  | 4424(13)   | 19(6)    |
| O(18A) | 0.576(9)  | 10810(100) | 7760(50)  | 3806(13)   | -1(7)    |
| O(18B) | 0.424(9)  | 8810(120)  | 7690(80)  | 3670(20)   | -1(9)    |

**Table S6.** Atomic coordinates ( $\times 10^4$ ), site occupancies and equivalent isotropic displacement parameters ( $\text{\AA}^2 \times 10^3$ ) for  $\text{Rb}_4\text{W}_{11}\text{O}_{35}$ .  $U_{eq}$  is defined as 1/3 of the trace of the orthogonalised  $U_{ij}$  tensor

| Atom   | Occupancy | $x/a$     | $y/b$     | $z/c$      | $U_{eq}$ |
|--------|-----------|-----------|-----------|------------|----------|
| W(1)   | 0.5       | 6006(8)   | 0         | 4.4(19)    | 6.1(4)   |
| W(2)   |           | 4443(13)  | 7466(10)  | 1229.8(12) | 28.0(7)  |
| W(3)   |           | 5352(6)   | 2519(10)  | 1221.3(11) | 17.6(8)  |
| W(4)   |           | 5477(5)   | 5000(9)   | 2491.6(5)  | 14.9(4)  |
| W(5)   |           | 5083(8)   | 2439(8)   | 3742.4(11) | 7.9(3)   |
| W(6A)  | 0.463(14) | 5953(19)  | 7624(14)  | 3755(3)    | 17.6(16) |
| W(6B)  | 0.537(14) | 4087(17)  | 7494(9)   | 3726.7(15) | 7.7(11)  |
| Rb(1)  | 0.895(5)  | 90(20)    | 72(19)    | 2505(2)    | 41.8(16) |
| Rb(2A) | 0.629(9)  | 0         | 5182(15)  | 0          | 24(3)    |
| Rb(2B) | 0.159(9)  | 5000      | 5180(30)  | 0          | 2(6)     |
| Rb(3)  | 0.871(9)  | 0         | 653(13)   | 5000       | 26.5(16) |
| Rb(4A) | 0.443(9)  | 0         | 5210(40)  | 5000       | 39(6)    |
| Rb(4B) | 0.108(9)  | 5000      | 5230(30)  | 5000       | 90(40)   |
| O(1)   |           | 10000     | 680(60)   | 0          | 26(10)   |
| O(2)   |           | 5190(110) | -1760(50) | 495(15)    | 23(7)    |
| O(3)   |           | 5890(100) | 1810(40)  | -522(13)   | 16(5)    |
| O(4)   |           | 150(60)   | 7820(60)  | 1128(18)   | 42(11)   |
| O(5)   |           | 4190(90)  | 6800(40)  | 1920(13)   | 15(5)    |
| O(6)   |           | 4590(80)  | 9960(70)  | 1414(9)    | 19(4)    |
| O(7)   |           | 4770(90)  | 4990(80)  | 999(9)     | 23(5)    |
| O(8)   |           | 9770(80)  | 2670(40)  | 1304(11)   | 12(5)    |
| O(9)   |           | 5160(90)  | 3200(50)  | 1882(13)   | 19(6)    |
| O(10)  |           | 9940(80)  | 5550(30)  | 2484(10)   | 9(4)     |
| O(11)  |           | 5100(80)  | 3070(40)  | 2915(12)   | 16(5)    |
| O(12)  |           | 5820(100) | 6820(40)  | 2962(13)   | 17(6)    |
| O(13)  |           | 5590(80)  | 1940(50)  | 4349(12)   | 20(6)    |
| O(14)  |           | 5160(80)  | 4950(60)  | 3813(8)    | 18(4)    |
| O(15)  |           | 270(70)   | 2530(50)  | 3626(10)   | 15(5)    |
| O(16)  |           | 5360(60)  | -20(50)   | 3481(7)    | 10(3)    |
| O(17)  |           | 10070(40) | 7930(30)  | 3778(7)    | -1(3)    |
| O(18)  |           | 4860(110) | 8000(50)  | 4399(14)   | 26(8)    |

**Table S7.** Atomic coordinates ( $\times 10^4$ ), site occupancies and equivalent isotropic displacement parameters ( $\text{\AA}^2 \times 10^3$ ) for  $\text{Cs}_4\text{W}_{11}\text{O}_{35}$ .  $U_{eq}$  is defined as 1/3 of the trace of the orthogonalised  $U_{ij}$  tensor

| Atom  | Occupancy | $x/a$     | $y/b$    | $z/c$      | $U_{eq}$ |
|-------|-----------|-----------|----------|------------|----------|
| W(1)  |           | 0         | 4866(16) | 0          | 34.8(8)  |
| W(2)  |           | 3137(5)   | 4670(9)  | 1214.6(7)  | 23.1(8)  |
| W(3A) | 0.70(2)   | 8116(7)   | 4181(19) | 1219.4(8)  | 11.2(8)  |
| W(3B) | 0.30(2)   | 8022(14)  | 5600(40) | 1194.4(17) | 6.5(18)  |
| W(4A) | 0.54(6)   | 6219(4)   | 4220(60) | 2475.0(9)  | 4.1(19)  |
| W(4B) | 0.46(6)   | 6211(6)   | 5420(80) | 2466.8(18) | 7(2)     |
| W(5)  |           | 9426(3)   | 5497(9)  | 3721.4(6)  | 6.8(3)   |
| W(6)  |           | 4293(3)   | 4319(10) | 3710.5(5)  | 9.9(3)   |
| Cs(1) | 0.816(6)  | 5000      | 0        | 0          | 10.9(7)  |
| Cs(2) | 0.943(3)  | 1168(6)   | -242(19) | 2468.5(7)  | 25.1(7)  |
| Cs(3) | 0.648(3)  | 7315(17)  | 58(17)   | 4896.3(12) | 58.7(17) |
| O(1)  |           | 0         | 500(300) | 0          | 59(10)   |
| O(2)  |           | 1550(40)  | 4830(50) | -502(11)   | 14(5)    |
| O(3)  |           | 2110(50)  | 4790(60) | 513(13)    | 22(7)    |
| O(4)  |           | 4110(40)  | 4850(50) | 1875(13)   | 17(6)    |
| O(5)  |           | 5450(60)  | 4820(60) | 988(5)     | 16(3)    |
| O(6)  |           | 700(70)   | 4730(70) | 1382(5)    | 20(3)    |
| O(7)  |           | 3200(40)  | -300(60) | 1244(7)    | 8(3)     |
| O(8)  |           | 8130(40)  | 30(60)   | 1113(11)   | 26(6)    |
| O(9)  |           | 7710(40)  | 4760(50) | 1869(12)   | 15(6)    |
| O(10) |           | 5990(40)  | 70(90)   | 2394(6)    | 16(5)    |
| O(11) |           | 8290(30)  | 4830(40) | 2899(10)   | 7(4)     |
| O(12) |           | 4550(50)  | 4810(60) | 2897(14)   | 28(8)    |
| O(13) |           | 10210(50) | 5430(90) | 4343(13)   | 38(7)    |
| O(14) |           | 9370(30)  | 200(40)  | 3676(6)    | 3(3)     |
| O(15) |           | 6910(60)  | 4800(70) | 3776(4)    | 14(3)    |
| O(16) |           | 11700(60) | 4860(50) | 3453(5)    | 13(3)    |
| O(17) |           | 4150(30)  | 4680(50) | 4364(8)    | 9(4)     |
| O(18) |           | 4280(40)  | -60(50)  | 3554(9)    | 24(5)    |

**Table S8.** Atomic coordinates ( $\times 10^4$ ), site occupancies and equivalent isotropic displacement parameters ( $\text{\AA}^2 \times 10^3$ ) for  $\text{Tl}_4\text{W}_{11}\text{O}_{35}$ .  $U_{eq}$  is defined as 1/3 of the trace of the orthogonalised  $U_{ij}$  tensor

| Atom  | Occupancy | $x/a$     | $y/b$      | $z/c$     | $U_{eq}$ |
|-------|-----------|-----------|------------|-----------|----------|
| W(1A) | 0.87(2)   | 0         | 5990(20)   | 0         | -0.4(7)  |
| W(1B) | 0.13(2)   | 0         | 4460(120)  | 0         | 13(6)    |
| W(2)  |           | 3184(3)   | 4755(16)   | 1230.1(7) | 16.1(5)  |
| W(3)  |           | 8148(3)   | 4536(15)   | 1232.6(5) | 9.2(4)   |
| W(4)  |           | 6278(3)   | 5709(14)   | 2500.6(3) | 8.9(4)   |
| W(5)  |           | 9459(2)   | 5792(15)   | 3759.0(6) | 5.8(2)   |
| W(6)  |           | 4348(3)   | 4716(15)   | 3764.0(7) | 7.3(3)   |
| Tl(1) | 0.884(6)  | 5000      | 0          | 0         | 59.7(14) |
| Tl(2) | 0.882(3)  | 1297(7)   | 387(17)    | 2569.8(8) | 44.8(6)  |
| Tl(3) | 0.676(3)  | 7413(12)  | 232(14)    | 4927.2(9) | 50.9(11) |
| O(1)  | 0.5       | 700(50)   | 10060(90)  | -50(20)   | 8(9)     |
| O(2)  |           | 1530(30)  | 5030(50)   | -508(8)   | 3(3)     |
| O(3)  |           | 2060(40)  | 6360(100)  | 540(11)   | 25(6)    |
| O(4)  |           | 3430(40)  | 210(90)    | 1279(10)  | 15(6)    |
| O(5)  |           | 4170(40)  | 6170(100)  | 1896(12)  | 22(5)    |
| O(6)  |           | 5500(50)  | 5170(60)   | 989(7)    | 15(4)    |
| O(7)  |           | 740(50)   | 5230(70)   | 1421(7)   | 17(4)    |
| O(8)  |           | 8000(40)  | 370(50)    | 1074(11)  | 20(6)    |
| O(9)  |           | 7750(30)  | 5070(60)   | 1912(10)  | 11(5)    |
| O(10) |           | 4630(30)  | 5140(50)   | 2932(8)   | 5(4)     |
| O(11) |           | 5530(40)  | 10140(100) | 2408(11)  | 25(6)    |
| O(12) |           | 8330(40)  | 6220(100)  | 2980(11)  | 23(5)    |
| O(13) |           | 10280(40) | 6290(100)  | 4398(12)  | 24(5)    |
| O(14) |           | 9740(60)  | 10460(140) | 3827(16)  | 43(11)   |
| O(15) |           | 11710(50) | 5390(60)   | 3481(6)   | 12(3)    |
| O(16) |           | 6900(40)  | 5310(60)   | 3843(6)   | 11(3)    |
| O(17) |           | 4140(40)  | 5200(70)   | 4423(11)  | 17(5)    |
| O(18) |           | 4190(20)  | 170(40)    | 3559(8)   | 2(3)     |

**Table S9.** Atomic coordinates ( $\times 10^4$ ), site occupancies and equivalent isotropic displacement parameters ( $\text{\AA}^2 \times 10^3$ ) for  $\text{K}_2\text{W}_7\text{O}_{22}$ .  $U_{eq}$  is defined as 1/3 of the trace of the orthogonalised  $U_{ij}$  tensor

| Atom   | Occupancy | $x/a$     | $y/b$     | $z/c$      | $U_{eq}$ |
|--------|-----------|-----------|-----------|------------|----------|
| W(1)   |           | 2828(3)   | 5560(50)  | 988.9(6)   | 18.2(5)  |
| W(2)   |           | 7975(3)   | 5300(50)  | 977.0(6)   | 25.4(8)  |
| W(3)   |           | 5985(3)   | 4470(50)  | 1990.4(4)  | 13.5(3)  |
| W(4A)  | 0.67(3)   | 8882(6)   | 5800(50)  | 3014.7(10) | 8.3(9)   |
| W(4B)  | 0.33(3)   | 8941(15)  | 4410(80)  | 3036(2)    | 18(3)    |
| W(5)   |           | 3960(3)   | 4830(50)  | 3013.4(7)  | 32.1(12) |
| W(6)   |           | 2046(4)   | 4830(50)  | 4002.9(4)  | 24.0(6)  |
| W(7)   |           | 5000      | 4280(50)  | 5000       | 4.7(3)   |
| W(8)   |           | 0         | 5650(50)  | 5000       | 8.2(4)   |
| K(1)   |           | 0         | 0         | 0          | 68(7)    |
| K(2)   | 0.437(9)  | 5000      | -130(100) | 0          | 12(4)    |
| K(3A)  | 0.572(5)  | 1070(60)  | 130(110)  | 1971(7)    | 62(7)    |
| K(3B)  | 0.191(4)  | 660(40)   | 4070(110) | 1974(9)    | -1(5)    |
| K(4A)  | 0.350(5)  | 3300(40)  | 110(100)  | 5977(7)    | 22(5)    |
| K(4B)  | 0.169(5)  | 2950(40)  | 2040(100) | 5982(8)    | -1(4)    |
| O(1)   |           | 2930(20)  | 9920(60)  | 937(6)     | -1(3)    |
| O(2)   |           | 2090(40)  | 4560(100) | 444(9)     | 22(5)    |
| O(3)   |           | 550(60)   | 5290(90)  | 1193(7)    | 25(5)    |
| O(4)   |           | 5420(50)  | 5300(90)  | 924(7)     | 25(5)    |
| O(5)   |           | 3890(40)  | 4610(90)  | 1646(8)    | 21(5)    |
| O(6)   |           | 8280(40)  | 5930(90)  | 464(9)     | 27(6)    |
| O(7)   |           | 7970(30)  | 90(70)    | 1074(8)    | 11(5)    |
| O(8)   |           | 7610(40)  | 5910(90)  | 1610(8)    | 20(5)    |
| O(9)   |           | 5840(60)  | -130(120) | 2070(9)    | 32(8)    |
| O(10)  |           | 8030(30)  | 4550(90)  | 2467(8)    | 17(5)    |
| O(11)  |           | 4380(40)  | 5730(100) | 2471(9)    | 22(5)    |
| O(12A) | 0.67(3)   | 8810(40)  | 1050(100) | 3066(9)    | 4(5)     |
| O(12B) | 0.33(3)   | 9390(70)  | -300(160) | 2935(16)   | -1(9)    |
| O(13)  |           | 6600(60)  | 5290(90)  | 3203(7)    | 27(5)    |
| O(14)  |           | 11440(60) | 5170(90)  | 2881(7)    | 25(5)    |
| O(15)  |           | 9910(30)  | 4520(100) | 3600(8)    | 18(5)    |
| O(16)  |           | 4000(70)  | 20(150)   | 3050(18)   | 70(20)   |
| O(17)  |           | 3580(30)  | 5790(90)  | 3597(8)    | 17(4)    |
| O(18)  |           | 4040(30)  | 4150(110) | 4435(8)    | 18(4)    |
| O(19)  |           | 2570(30)  | -130(90)  | 4038(6)    | 5(4)     |
| O(20)  |           | 390(30)   | 5760(90)  | 4435(8)    | 15(4)    |
| O(21)  | 0.5       | 4960(80)  | -220(130) | 5146(19)   | 22(11)   |
| O(22)  |           | 2570(60)  | 5060(90)  | 5163(7)    | 23(5)    |
| O(23)  |           | 0         | 600(200)  | 5000       | 62(19)   |



**Table S10.** Atomic coordinates ( $\times 10^4$ ), site occupancies and equivalent isotropic displacement parameters ( $\text{\AA}^2 \times 10^3$ ) for  $\text{Rb}_2\text{W}_7\text{O}_{22}$ .  $U_{eq}$  is defined as 1/3 of the trace of the orthogonalised  $U_{ij}$  tensor

| Atom  | Occupancy | $x/a$     | $y/b$     | $z/c$      | $U_{eq}$ |
|-------|-----------|-----------|-----------|------------|----------|
| W(1)  |           | 5007(9)   | 2480(30)  | 993.5(10)  | 19.5(10) |
| W(2)  |           | 4851(15)  | 7610(30)  | 996.0(9)   | 43(2)    |
| W(3)  |           | 4987(14)  | 5090(30)  | 2005.6(6)  | 25.1(9)  |
| W(4)  |           | 4623(5)   | 2640(30)  | 3035.4(11) | 11.6(7)  |
| W(5)  |           | 5802(6)   | 7560(30)  | 3026.1(12) | 13.4(6)  |
| W(6)  |           | 4850(20)  | 70(30)    | 4011.0(6)  | 44.0(15) |
| W(7)  |           | 4840(13)  | 2590(30)  | 5006(2)    | 39.7(9)  |
| Rb(1) | 0.756(4)  | -110(60)  | 0         | 1986(2)    | 51(4)    |
| Rb(2) | 0.574(4)  | 180(80)   | 4930(30)  | 4016(3)    | 46(5)    |
| Rb(3) | 0.670(4)  | 490(30)   | 5010(50)  | 64(3)      | 81(6)    |
| O(1)  |           | 5470(140) | 2040(80)  | 485(17)    | 31(12)   |
| O(2)  |           | 480(110)  | 2430(100) | 1012(15)   | 37(13)   |
| O(3)  |           | 4720(150) | 80(100)   | 1205(9)    | 21(7)    |
| O(4)  |           | 5070(130) | 5110(90)  | 938(8)     | 14(6)    |
| O(5)  |           | 4650(100) | 3180(60)  | 1659(12)   | 9(7)     |
| O(6)  |           | 5270(130) | 8120(70)  | 465(15)    | 22(10)   |
| O(7)  |           | 9760(100) | 7420(70)  | 1137(13)   | 19(8)    |
| O(8)  |           | 4450(110) | 6940(60)  | 1661(13)   | 15(8)    |
| O(9)  |           | 9680(140) | 4700(300) | 2060(30)   | 150(40)  |
| O(10) |           | 5240(110) | 3260(60)  | 2485(12)   | 9(7)     |
| O(11) |           | 5480(120) | 6910(60)  | 2511(14)   | 14(8)    |
| O(12) |           | 8880(100) | 2760(80)  | 3158(15)   | 33(11)   |
| O(13) |           | 4720(120) | 5140(70)  | 3212(8)    | 12(6)    |
| O(14) |           | 5410(120) | 90(100)   | 2907(10)   | 21(7)    |
| O(15) |           | 4510(130) | 1890(70)  | 3619(16)   | 24(11)   |
| O(16) |           | 1230(80)  | 7780(50)  | 2995(9)    | -1(5)    |
| O(17) |           | 4690(110) | 8270(60)  | 3625(14)   | 16(9)    |
| O(18) |           | 490(180)  | 650(70)   | 4058(14)   | 31(13)   |
| O(19) |           | 5330(110) | -1720(60) | 4430(13)   | 14(8)    |
| O(20) |           | 5480(140) | 1830(70)  | 4451(17)   | 25(11)   |
| O(21) |           | 9710(130) | 2760(90)  | 4939(17)   | 35(13)   |
| O(22) |           | 4830(170) | 5100(110) | 4838(10)   | 24(7)    |

**Table S11.** Atomic coordinates ( $\times 10^4$ ), site occupancies and equivalent isotropic displacement parameters ( $\text{\AA}^2 \times 10^3$ ) for  $\text{Cs}_2\text{W}_7\text{O}_{22}$ .  $U_{eq}$  is defined as 1/3 of the trace of the orthogonalised  $U_{ij}$  tensor

| Atom  | Occupancy | $x/a$      | $y/b$     | $z/c$      | $U_{eq}$ |
|-------|-----------|------------|-----------|------------|----------|
| W(1)  |           | 4784(10)   | 2450(20)  | 1023(2)    | 15.5(12) |
| W(2)  |           | 5030(20)   | 7580(20)  | 1036(2)    | 50(3)    |
| W(3)  |           | 5040(20)   | 5040(20)  | 2039.5(10) | 30.5(13) |
| W(4)  |           | 4624(9)    | 2570(30)  | 3055.5(18) | 11.0(10) |
| W(5)  |           | 5783(11)   | 7490(30)  | 3049.5(19) | 17.1(11) |
| W(6)  |           | 5010(20)   | 30(30)    | 4021.3(10) | 35.7(14) |
| W(7)  |           | 5100(20)   | 2510(30)  | 5000(3)    | 38.8(15) |
| Cs(1) | 0.808(4)  | -270(30)   | 0         | 2041(2)    | 30(2)    |
| Cs(2) | 0.588(4)  | -300(40)   | 5060(30)  | 4032(3)    | 23(3)    |
| Cs(3) | 0.604(4)  | 460(40)    | 4860(40)  | 69(4)      | 60(5)    |
| O(1)  |           | 430(110)   | 2550(120) | 1080(20)   | 20(16)   |
| O(2)  |           | 5400(130)  | 2130(70)  | 517(13)    | 14(13)   |
| O(3)  |           | 5060(130)  | 4890(100) | 1003(12)   | 9(10)    |
| O(4)  |           | 5030(180)  | 90(120)   | 1246(12)   | 12(9)    |
| O(5)  |           | 4740(170)  | 3080(100) | 1700(30)   | 40(20)   |
| O(6)  |           | 5510(150)  | 8100(70)  | 500(18)    | 12(13)   |
| O(7)  |           | 9800(140)  | 7610(100) | 1130(20)   | 9(14)    |
| O(8)  |           | 4880(120)  | 6880(70)  | 1683(19)   | -1(11)   |
| O(9)  |           | 930(100)   | 4630(50)  | 2110(14)   | -1(11)   |
| O(10) |           | 5640(140)  | 6720(70)  | 2510(18)   | 4(10)    |
| O(11) |           | 5560(130)  | 3130(60)  | 2527(18)   | 3(10)    |
| O(12) |           | 240(150)   | 2460(140) | 3090(20)   | 16(14)   |
| O(13) |           | 5060(180)  | 5010(120) | 3237(12)   | 12(9)    |
| O(14) |           | 5410(170)  | -20(120)  | 2915(14)   | 21(11)   |
| O(15) |           | 4860(140)  | 1830(80)  | 3650(20)   | 12(14)   |
| O(16) |           | 10600(160) | 7460(160) | 3090(30)   | 34(19)   |
| O(17) |           | 4620(150)  | 8210(90)  | 3600(20)   | 20(17)   |
| O(18) |           | 650(110)   | -120(90)  | 4057(12)   | 0(12)    |
| O(19) |           | 5360(140)  | 1760(70)  | 4450(20)   | 5(11)    |
| O(20) |           | 5640(160)  | -1800(80) | 4450(20)   | 17(14)   |
| O(21) |           | 9220(90)   | 2270(60)  | 4960(17)   | -1(10)   |
| O(22) |           | 5100(200)  | 5030(150) | 4847(14)   | 24(10)   |

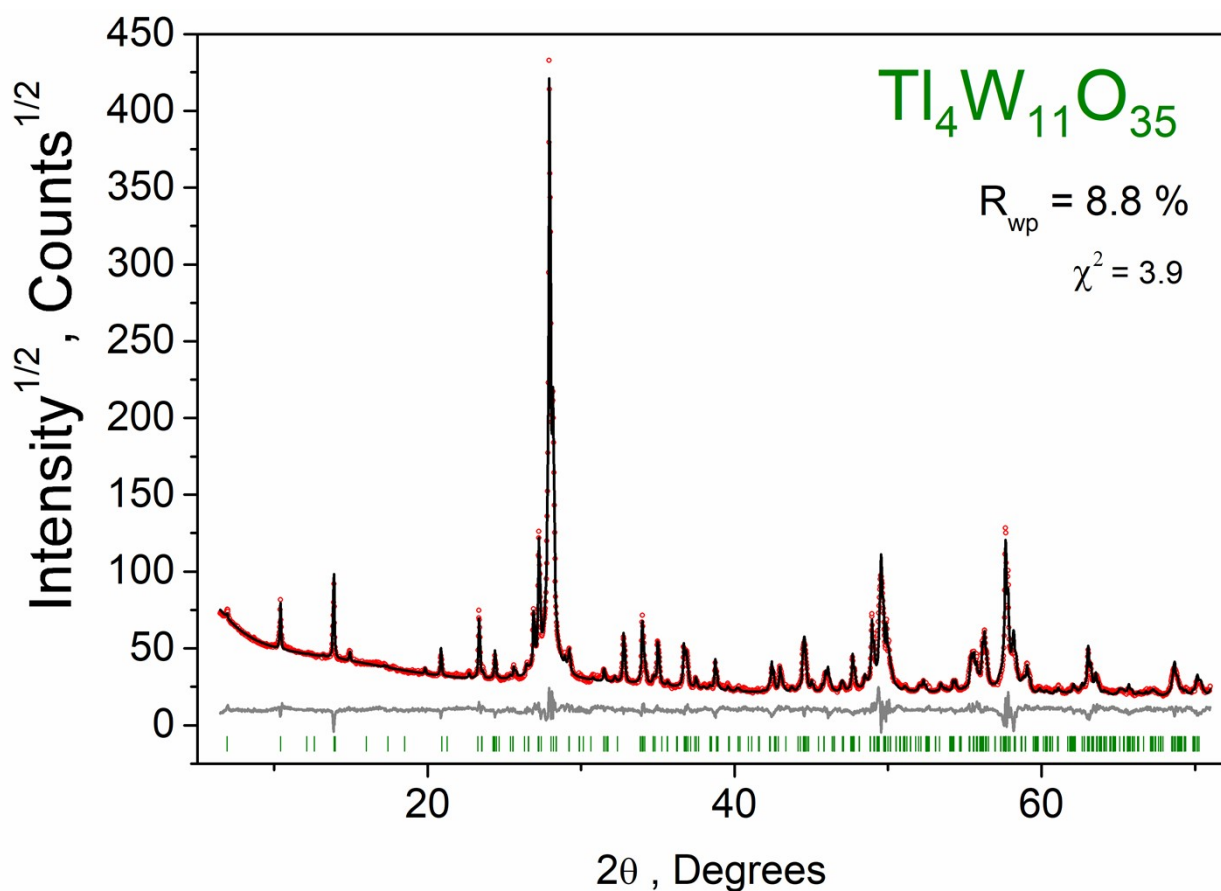

**Figure S19:** Observed, calculated and difference PXRD patterns of  $\text{Ti}_4\text{W}_{11}\text{O}_{35}$

**Table S12.** Observed and calculated PXRD peaks for  $\text{Ti}_4\text{W}_{11}\text{O}_{35}$

| No. | $2\theta$ (obs.), ° | $I$ (obs.), % | $2\theta$ (calc.), ° | $I$ (calc.), % | $h, k, l$ |
|-----|---------------------|---------------|----------------------|----------------|-----------|
| 1   | 6.909               | 1             | 6.905                | 0.2            | 2 0 0     |
| 2   | 10.366              | 2             | 10.369               | 1.6            | 3 0 0     |
| 3   | 13.837              | 3             | 13.835               | 3.3            | 4 0 0     |
| 4   | 14.870              | < 1           | 14.865               | 0.1            | 2 0 1     |
|     |                     |               | 14.892               | 0.1            | -3 0 1    |
| 5   | 19.761              | < 1           | 19.783               | 0.1            | -5 0 1    |
| 6   | 20.817              | 1             | 20.817               | 0.7            | 6 0 0     |
| 7   | 22.656              | < 1           | 22.658               | < 0.1          | -6 0 1    |
| 8   | 23.299              | 2             | 23.297               | 2.1            | 0 1 0     |
| 9   | 23.555              | < 1           | 23.559               | 0.1            | 1 1 0     |
| 10  | 24.340              | < 1           | 24.325               | 0.1            | -1 0 2    |
|     |                     |               | 24.335               | 0.6            | 7 0 0     |
| 11  | 25.348              | < 1           | 25.328               | < 0.1          | -3 0 2    |
| 12  | 25.560              | < 1           | 25.558               | 0.3            | 3 1 0     |
| 13  | 26.861              | 2             | 26.845               | 1.0            | 1 1 1     |
|     |                     |               | 26.855               | 1.2            | -2 1 1    |

|    |        |     |        |       |         |
|----|--------|-----|--------|-------|---------|
| 14 | 27.197 | 8   | 27.195 | 7.7   | 4 1 0   |
| 15 | 27.882 | 100 | 27.878 | 100.0 | 8 0 0   |
| 16 | 28.101 | 24  | 28.066 | 7.7   | 3 0 2   |
|    |        |     | 28.113 | 18.2  | -5 0 2  |
| 17 | 30.756 | < 1 | 30.721 | < 0.1 | 4 1 1   |
| 18 | 31.424 | < 1 | 31.440 | 0.3   | 6 1 0   |
| 19 | 32.715 | 2   | 32.696 | 1.0   | 5 1 1   |
|    |        |     | 32.724 | 1.0   | -6 1 1  |
| 20 | 33.950 | 3   | 33.933 | 2.5   | -1 1 2  |
| 21 | 34.137 | < 1 | 34.114 | 0.2   | 0 1 2   |
|    |        |     | 34.124 | 0.1   | -2 1 2  |
| 22 | 34.681 | < 1 | 34.643 | < 0.1 | 6 0 2   |
|    |        |     | 34.661 | < 0.1 | 1 1 2   |
|    |        |     | 34.680 | < 0.1 | -3 1 2  |
| 23 | 34.951 | 2   | 34.934 | 0.9   | 6 1 1   |
|    |        |     | 34.965 | 0.8   | -7 1 1  |
| 24 | 35.600 | < 1 | 35.588 | < 0.1 | -4 1 2  |
| 25 | 36.646 | 1   | 36.639 | 1.4   | 8 1 0   |
| 26 | 36.789 | 1   | 36.787 | 0.4   | 3 1 2   |
| 27 | 36.848 | 1   | 36.824 | 0.7   | -5 1 2  |
| 28 | 37.423 | < 1 | 37.396 | 0.1   | 7 1 1   |
|    |        |     | 37.430 | 0.2   | -8 1 1  |
| 29 | 38.695 | 1   | 38.685 | 1.3   | 11 0 0  |
| 30 | 39.498 | < 1 | 39.503 | 0.1   | 9 1 0   |
| 31 | 42.182 | < 1 | 42.168 | < 0.1 | 6 1 2   |
|    |        |     | 42.226 | < 0.1 | -8 1 2  |
| 32 | 42.384 | 1   | 42.363 | 0.8   | 12 0 0  |
|    |        |     | 42.415 | 0.1   | 11 0 1  |
| 33 | 42.871 | < 1 | 42.874 | 0.3   | 9 1 1   |
| 34 | 42.917 | 1   | 42.913 | 0.5   | -10 1 1 |
| 35 | 44.440 | 2   | 44.437 | 1.3   | 7 1 2   |
| 36 | 44.542 | 1   | 44.500 | 1.5   | -9 1 2  |
| 37 | 44.991 | < 1 | 44.962 | 0.2   | 1 1 3   |
| 38 | 45.866 | 1   | 45.844 | 0.2   | 10 1 1  |
|    |        |     | 45.885 | 0.4   | -11 1 1 |
| 39 | 46.035 | < 1 | 46.038 | 0.5   | -13 0 1 |
| 40 | 46.940 | < 1 | 46.902 | 0.2   | 8 1 2   |
|    |        |     | 46.970 | 0.2   | -10 1 2 |
| 41 | 47.646 | 1   | 47.634 | 1.3   | 0 2 0   |
| 42 | 48.425 | < 1 | 48.435 | 0.4   | -7 1 3  |
| 43 | 48.913 | 3   | 48.902 | 3.1   | 12 1 0  |
| 44 | 49.409 | 3   | 49.407 | 3.0   | 11 0 2  |
| 45 | 49.502 | 7   | 49.494 | 8.0   | -13 0 2 |
| 46 | 49.880 | 3   | 49.842 | 2.2   | -2 0 4  |
|    |        |     | 49.846 | 0.2   | 4 2 0   |

|    |        |     |        |      |         |
|----|--------|-----|--------|------|---------|
| 47 | 50.165 | < 1 | 50.188 | 0.2  | -3 2 1  |
| 48 | 52.277 | < 1 | 52.264 | 0.3  | 13 1 0  |
| 49 | 53.379 | < 1 | 53.401 | 0.1  | -15 0 1 |
| 50 | 54.221 | < 1 | 54.191 | 0.3  | -1 2 2  |
| 51 | 55.271 | < 1 | 55.309 | 0.8  | 11 1 2  |
| 52 | 55.369 | 1   | 55.389 | 1.0  | -13 1 2 |
| 53 | 55.485 | 1   | 55.520 | 0.4  | 13 1 1  |
| 54 | 55.571 | 1   | 55.565 | 0.6  | -14 1 1 |
| 55 | 55.754 | 1   | 55.711 | 0.3  | -2 1 4  |
|    |        |     | 55.732 | 0.2  | 14 1 0  |
| 56 | 56.123 | 2   | 56.095 | 1.8  | 8 2 0   |
| 57 | 56.239 | 2   | 56.202 | 1.0  | 3 2 2   |
|    |        |     | 56.228 | 0.9  | -5 2 2  |
|    |        |     | 56.237 | 0.2  | 8 1 3   |
| 58 | 56.359 | < 1 | 56.332 | 0.3  | -11 1 3 |
| 59 | 57.631 | 11  | 57.602 | 13.0 | 16 0 0  |
|    |        |     | 57.674 | 0.4  | 2 1 4   |
| 60 | 58.040 | 1   | 58.020 | 1.0  | 6 0 4   |
| 61 | 58.149 | 1   | 58.124 | 2.4  | -10 0 4 |
| 62 | 58.783 | < 1 | 58.799 | 0.2  | -12 1 3 |
| 63 | 59.021 | 1   | 58.977 | 0.3  | 14 1 1  |
|    |        |     | 59.024 | 0.7  | -15 1 1 |
| 64 | 61.061 | < 1 | 61.018 | 0.1  | 16 0 1  |
|    |        |     | 61.070 | 0.1  | -17 0 1 |
| 65 | 62.018 | < 1 | 62.003 | 0.1  | 7 2 2   |
|    |        |     | 62.053 | 0.2  | -9 2 2  |
| 66 | 62.596 | < 1 | 62.597 | 0.2  | -16 1 1 |
| 67 | 63.012 | 2   | 62.983 | 2.2  | 16 1 0  |
| 68 | 63.483 | 1   | 63.478 | 0.5  | -10 1 4 |
|    |        |     | 63.497 | 0.2  | -17 0 2 |
| 69 | 65.647 | < 1 | 65.622 | 0.3  | 12 2 0  |
| 70 | 67.250 | < 1 | 67.215 | 0.1  | -15 1 3 |
| 71 | 68.499 | 1   | 68.515 | 0.5  | 15 1 2  |
| 72 | 68.607 | 1   | 68.610 | 1.2  | -17 1 2 |

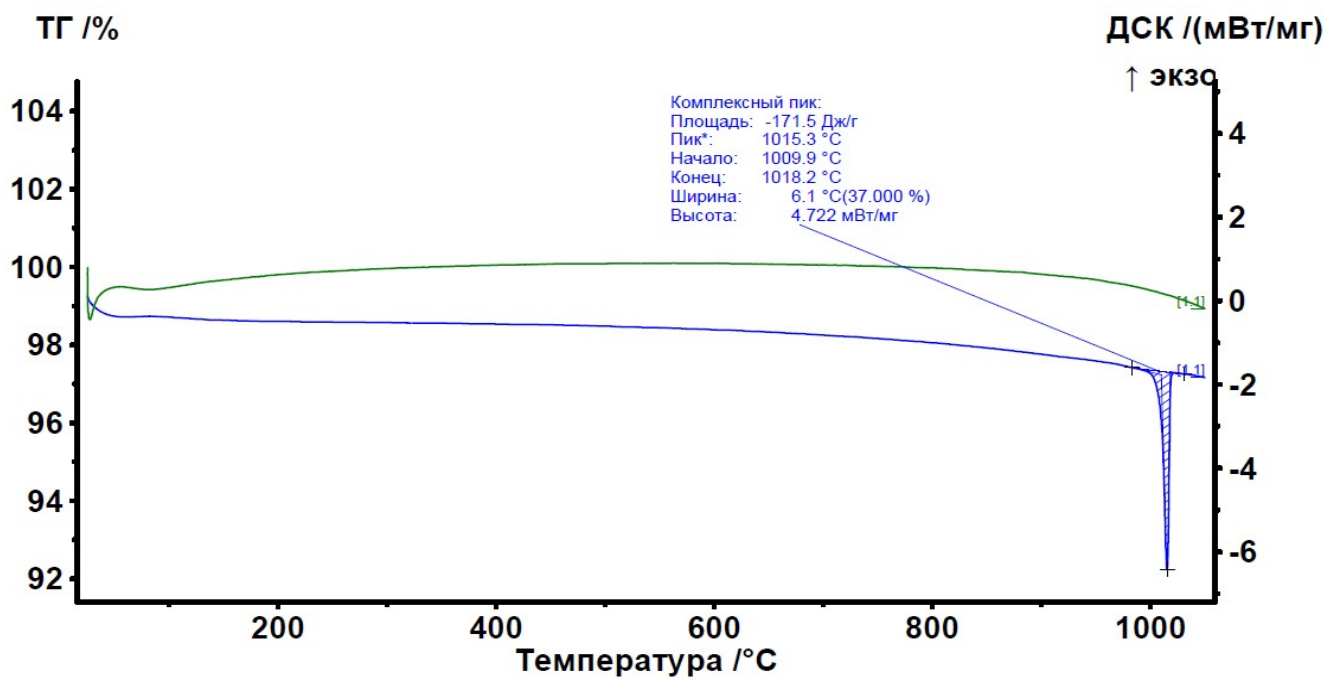

Figure S20. DSC-TG curves (STA 449 F1 Jupiter, Netzsch) of  $Tl_4W_{11}O_{35}$
